# Supplementary material for: Sugar-boronate ester scaffold tethered pyridyl-imine palladium(ii) complexes: synthesis and their in vitro anticancer evaluation
Source: Royal Society of Chemistry journal article supplement (doi:10.1039/c5dt03266k), 2015-01-01
Supplement: c5dt03266k1.pdf [file c5dt03266k1.pdf]

## Supporting Information

# Sugar-boronate ester scaffold tethered pyridyl-imine palladium(II) complexes: Synthesis and their *in vitro* anticancer evaluation

Eda Rami Reddy,<sup>a</sup> Rajiv Trivedi,<sup>\*,a</sup> Akella Venkata Subrahmanya Sarma,<sup>b</sup>  
Balasubramanian Sridhar,<sup>c</sup> Hasitha Shilpa Anantharaju,<sup>d</sup> Dharmarajan Sriram,<sup>d</sup>  
Perumal Yogeeswari<sup>d</sup>, and Narayana Nagesh<sup>\*,e</sup>

<sup>\*,a</sup> Inorganic and Physical Chemistry Division, CSIR-IICT, Hyderabad-500007, India. Fax: +91-40-27160921. Tel: +91-40- 27191667.

E-mail: [trivedi@iict.res.in](mailto:trivedi@iict.res.in), [rtrajiv401@gmail.com](mailto:rtrajiv401@gmail.com)

## Contents of Supporting Information

|                                                                                                   |       |
|---------------------------------------------------------------------------------------------------|-------|
| 1) <sup>1</sup> H, <sup>13</sup> C and <sup>11</sup> B NMR spectra of <b>3a-e</b> and <b>5a-e</b> | 2-16  |
| 2) Structures of ligands <b>4a-e</b>                                                              | 17    |
| 3) Stability studies of <b>5a</b>                                                                 | 17-19 |
| 4) <sup>1</sup> H and <sup>13</sup> C NMR spectra of <b>6a-b</b>                                  | 19-21 |
| 5) Table S1. Bond lengths [Å] and angles [°] for <b>3a</b>                                        | 21-24 |
| 6) Table S2. Bond lengths [Å] and angles [°] for <b>5a</b>                                        | 24-28 |

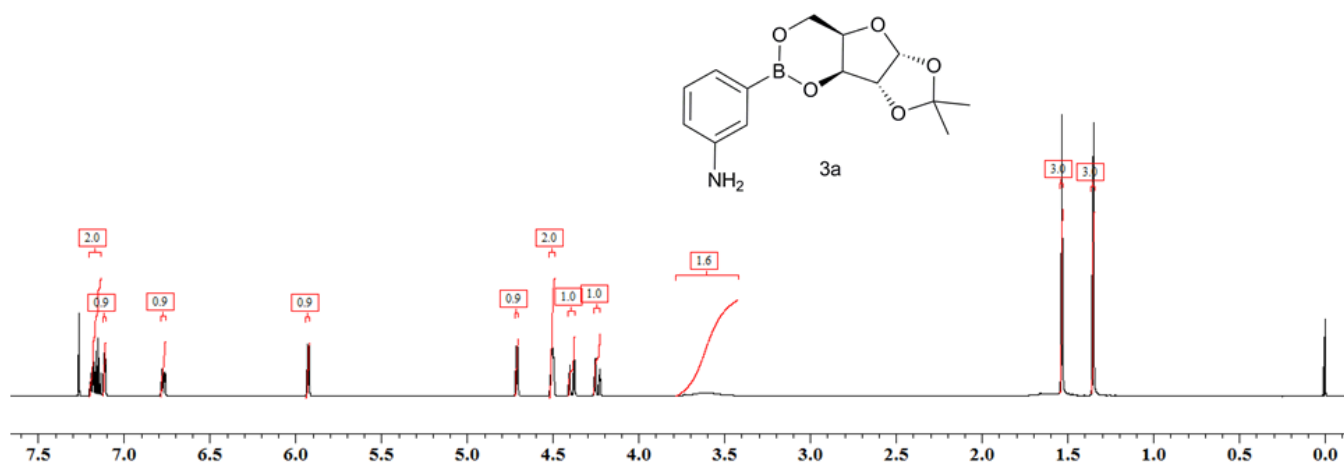

Figure S1:  $^1\text{H}$  NMR spectrum of compound **3a**.

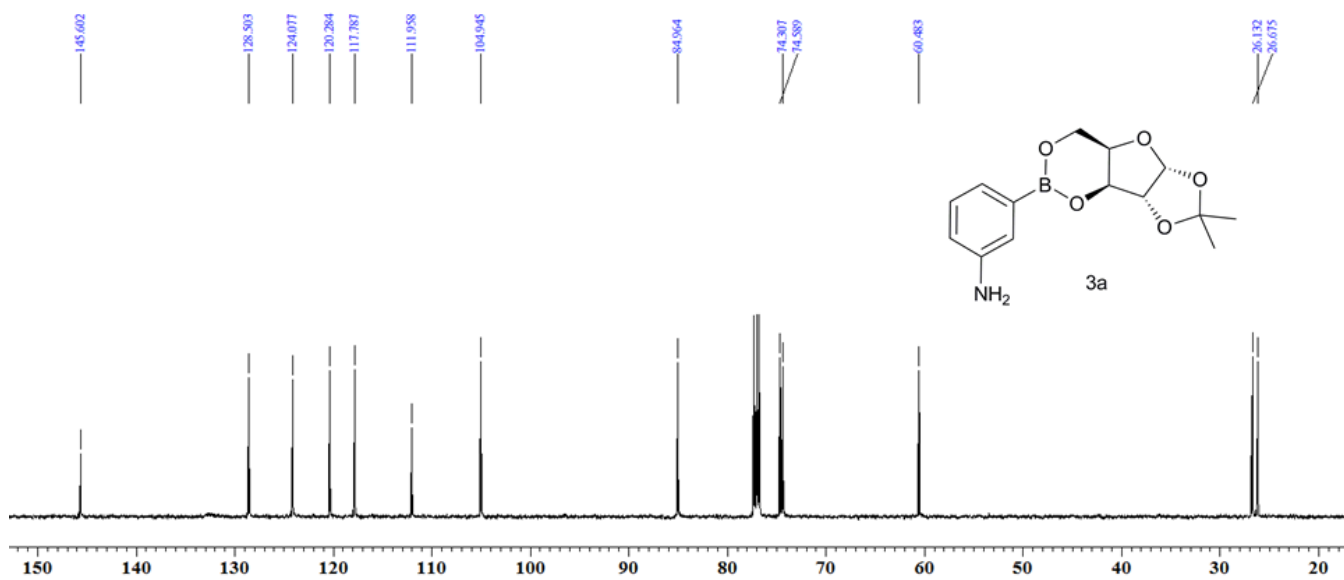

Figure S2:  $^{13}\text{C}$  NMR spectrum of compound **3a**.

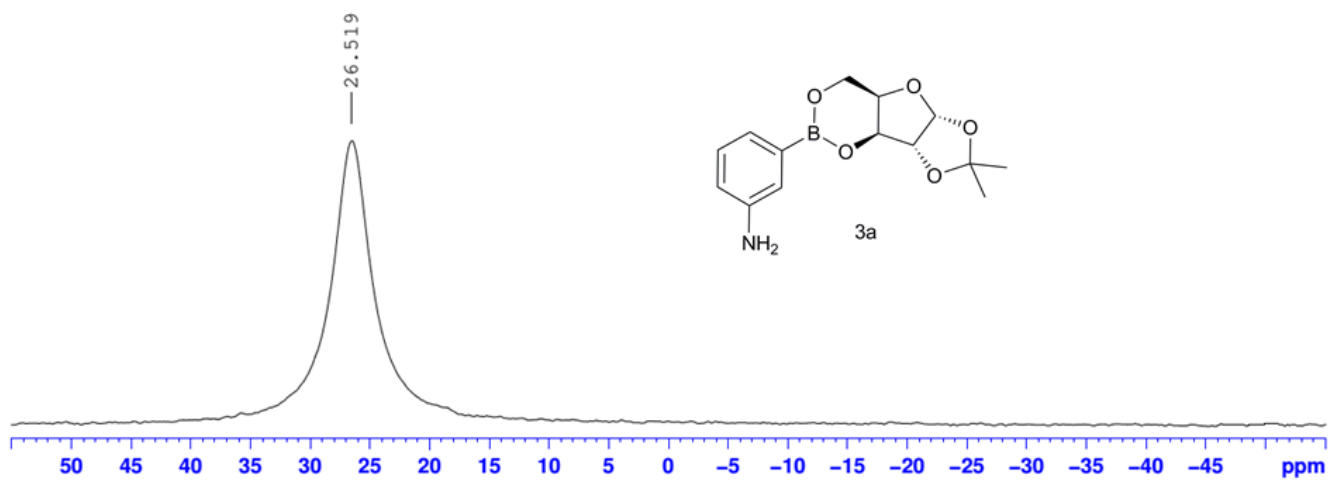

Figure S3:  $^{11}\text{B}$  NMR spectrum of compound **3a**.

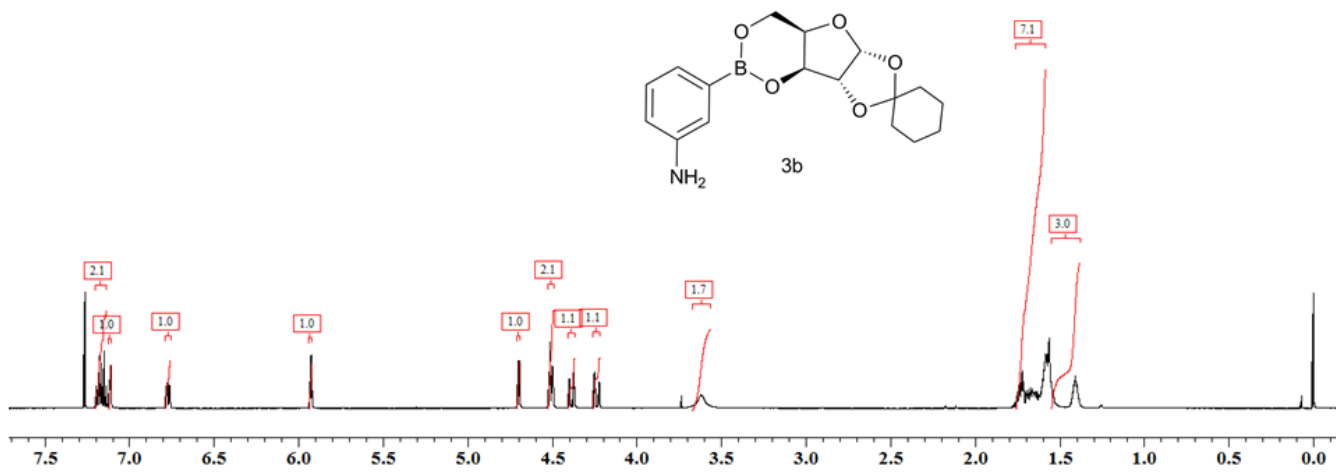

Figure S4:  $^1\text{H}$  NMR spectrum of compound **3b**.

(Note: Moisture peak was observed at  $\delta$  1.57-1.59 ppm)

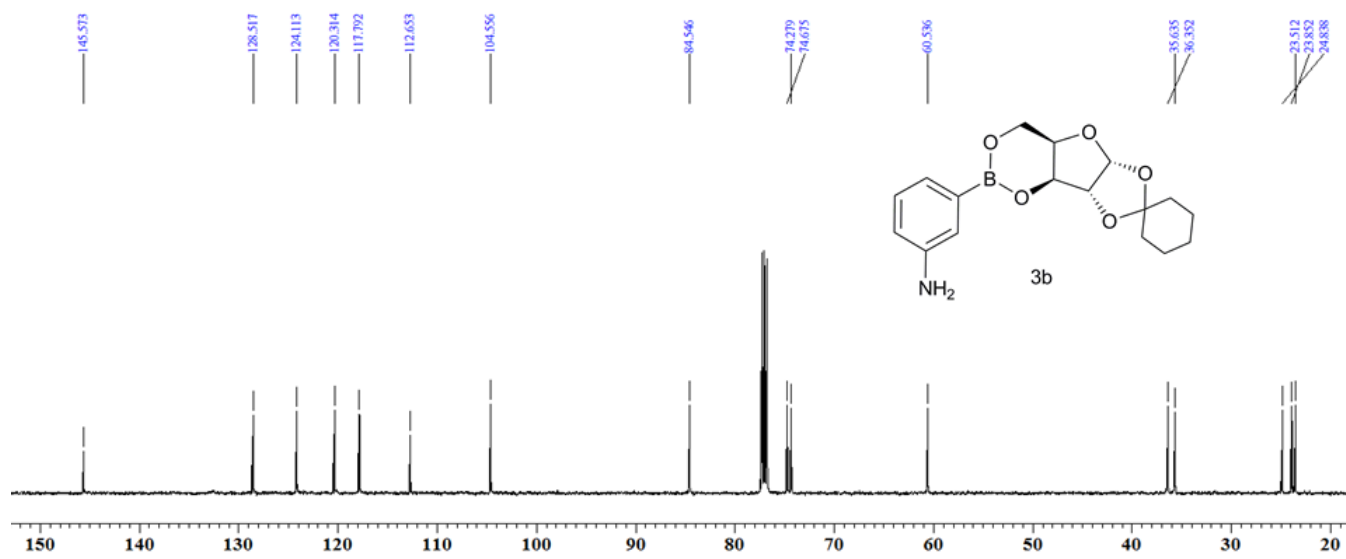

Figure S5:  $^{13}\text{C}$  NMR spectrum of compound **3b**.

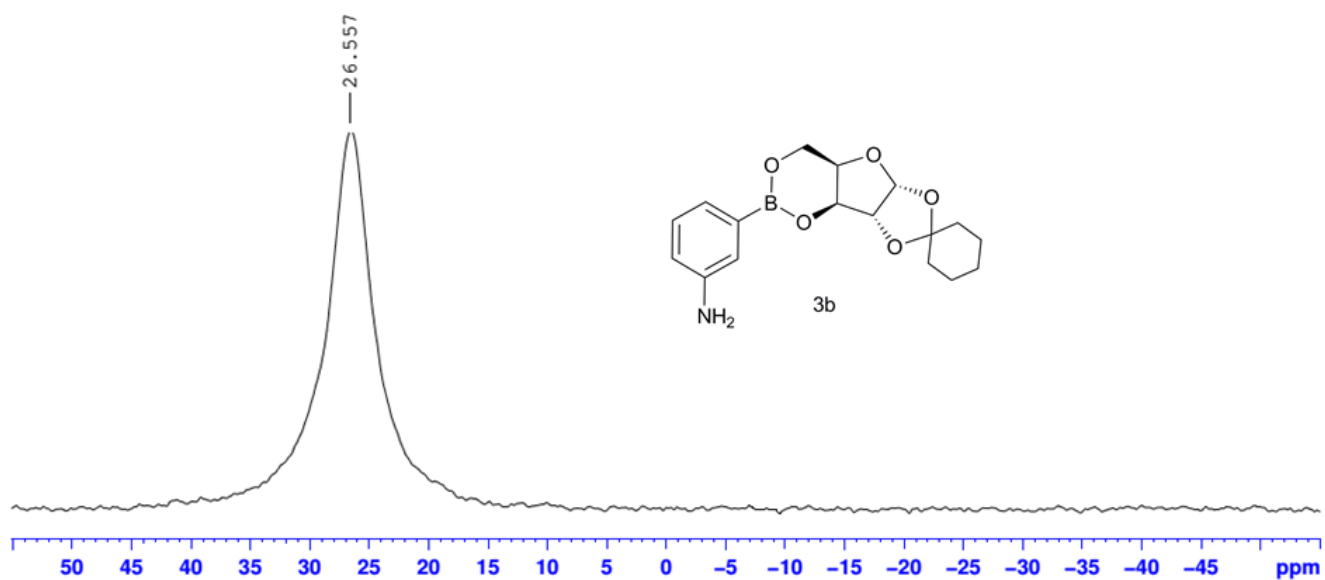

Figure S6:  $^{11}\text{B}$  NMR spectrum of compound **3b**.

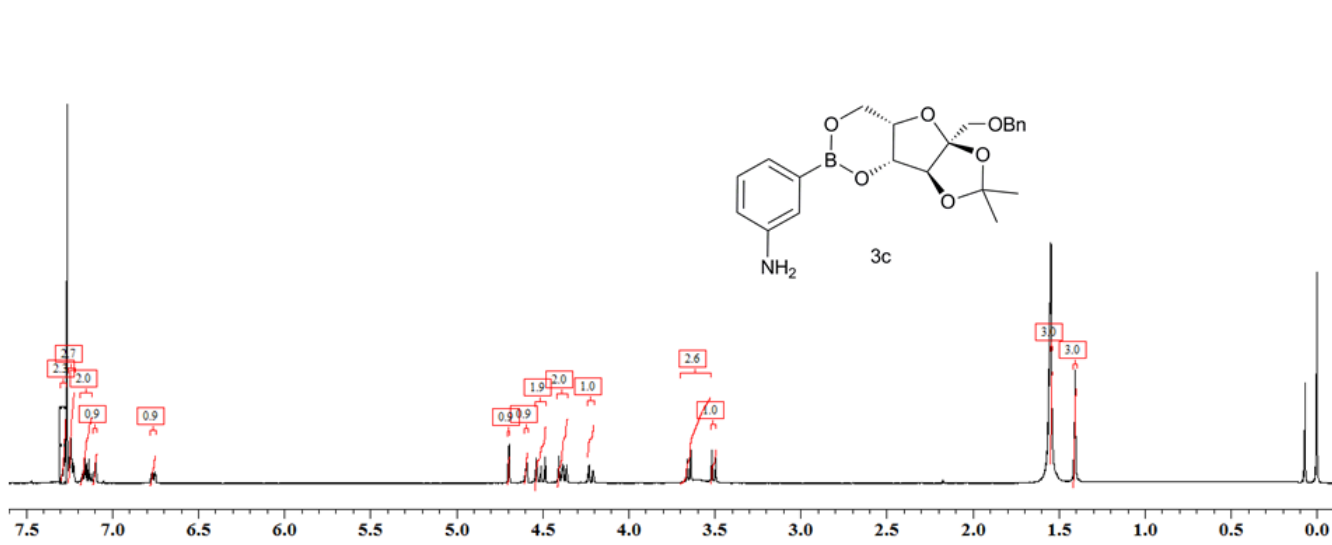

Figure S7: <sup>1</sup>H NMR spectrum of compound **3c**

(Note: Moisture peak was observed at  $\delta$  1.54-1.59 ppm)

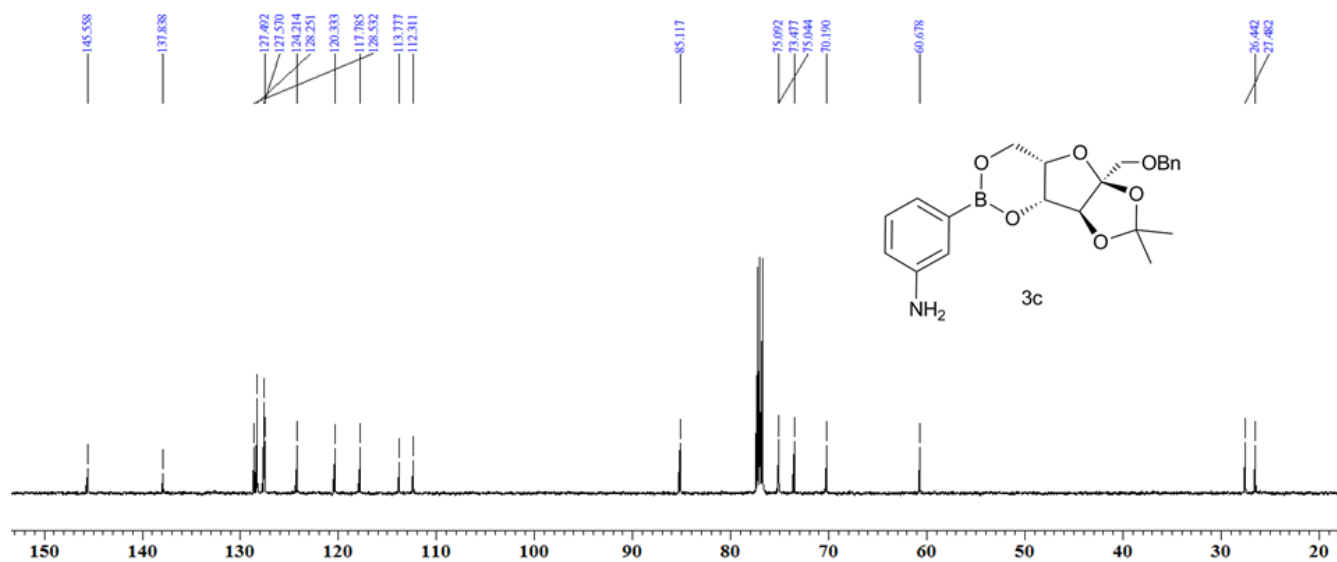

Figure S8: <sup>13</sup>C NMR spectrum of compound **3c**.

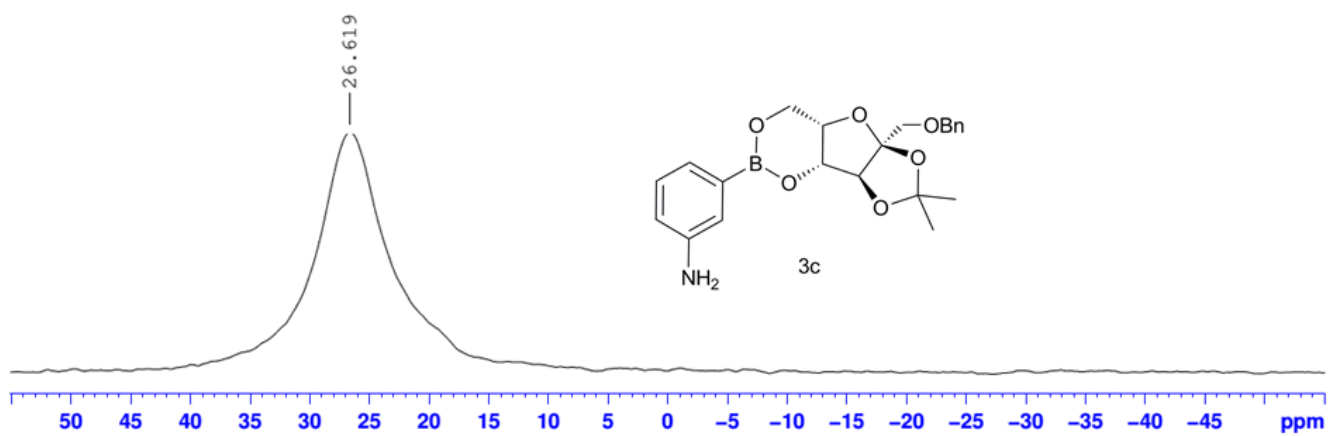

Figure S9:  $^{11}\text{B}$  NMR spectrum of compound **3c**.

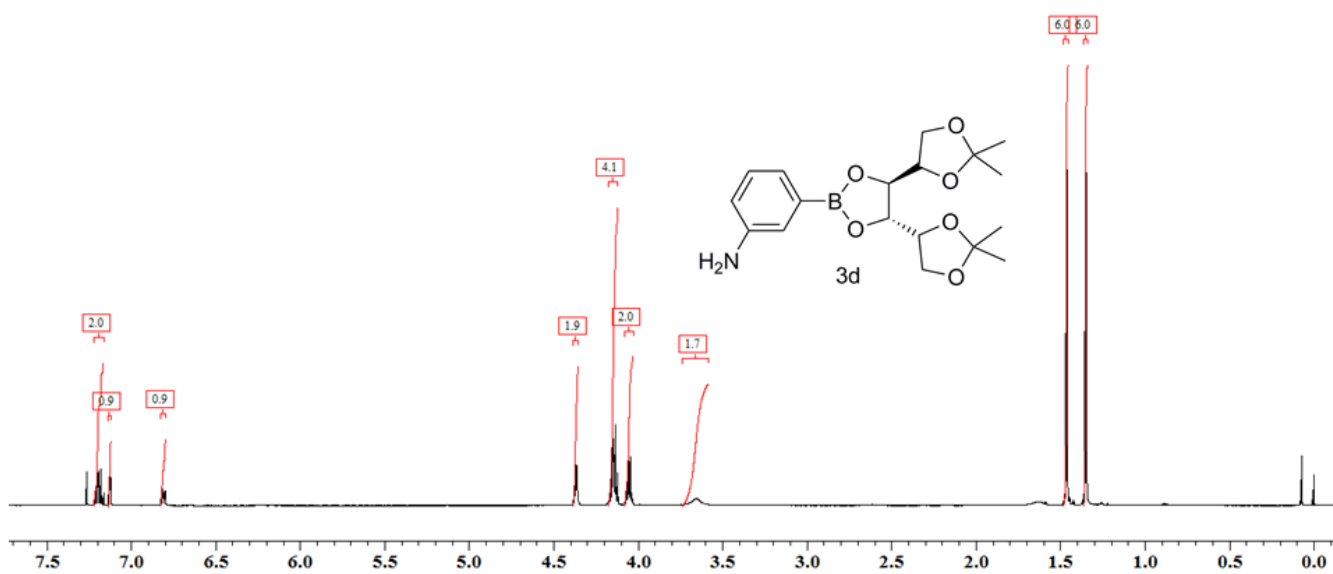

Figure S10:  $^1\text{H}$  NMR spectrum of compound **3d**.

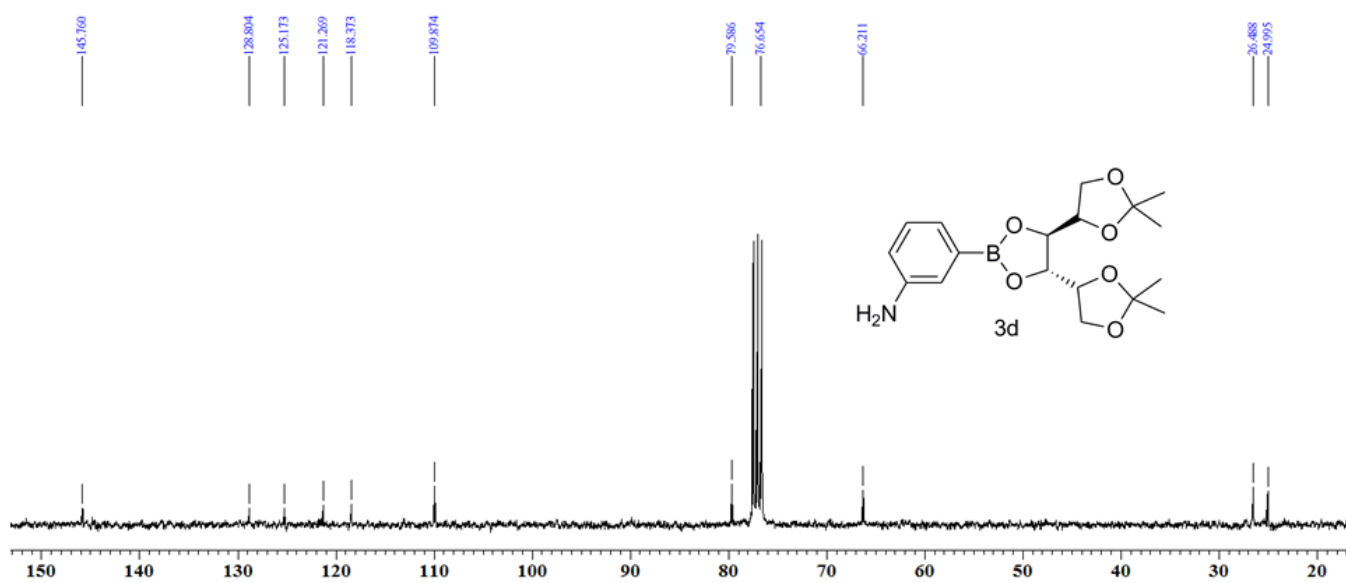

Figure S11:  $^{13}\text{C}$  NMR spectrum of compound **3d**.

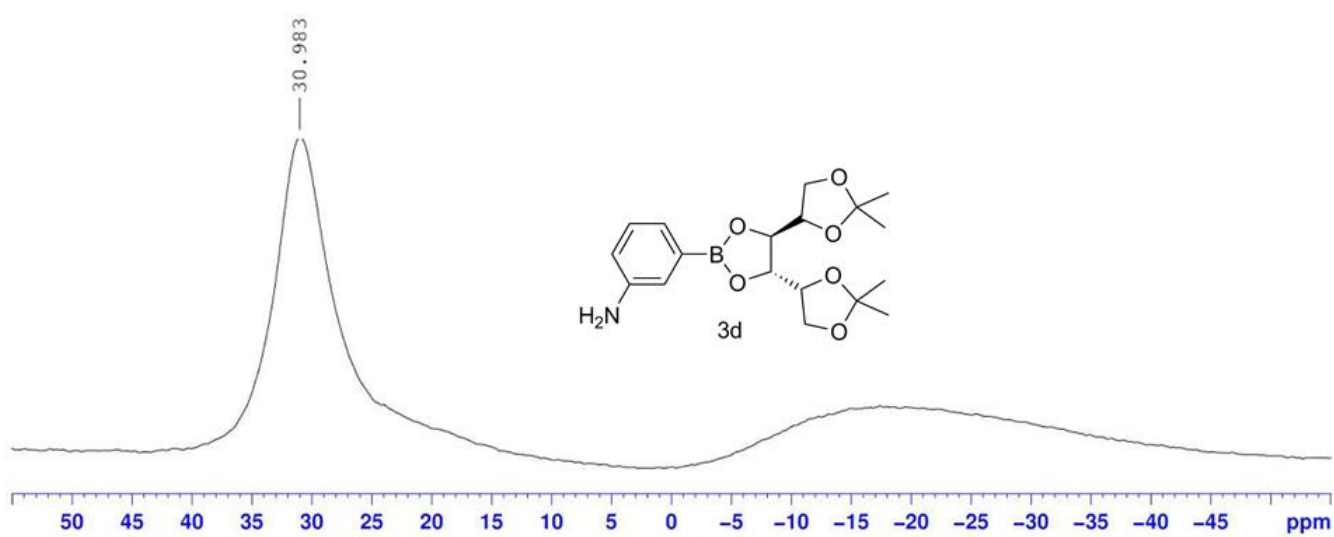

Figure S12:  $^{11}\text{B}$  NMR spectrum of compound **3d**.

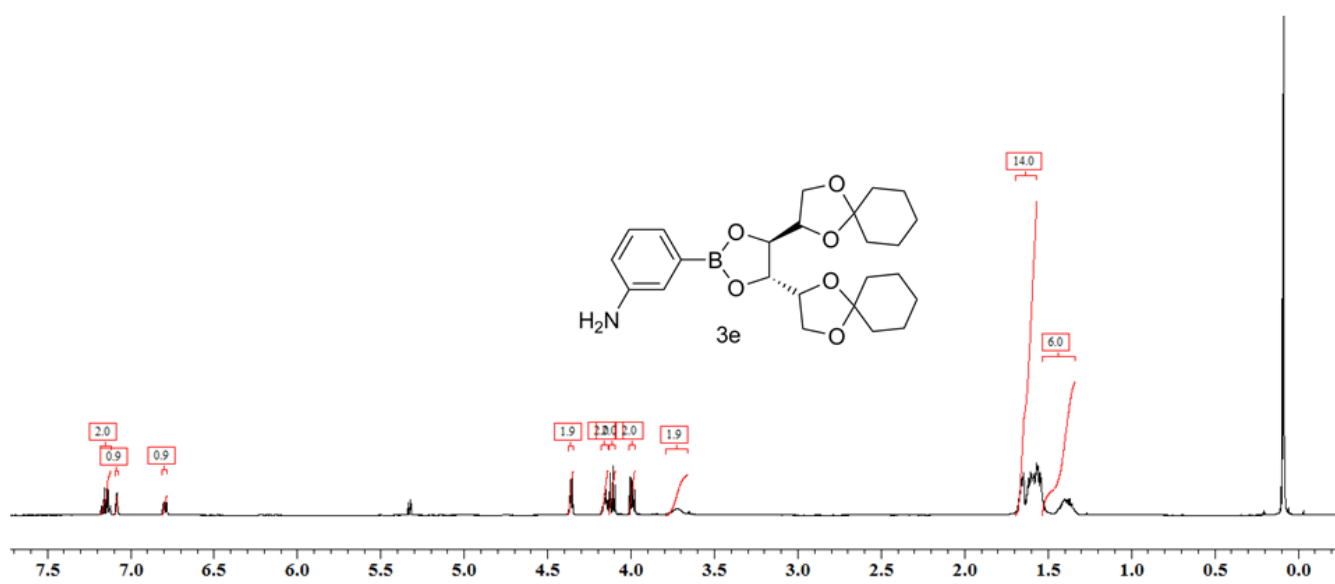

Figure S13:  $^1\text{H}$  NMR spectrum of compound **3e**.

(Note: Moisture peak was observed at  $\delta$  1.57-1.59 ppm)

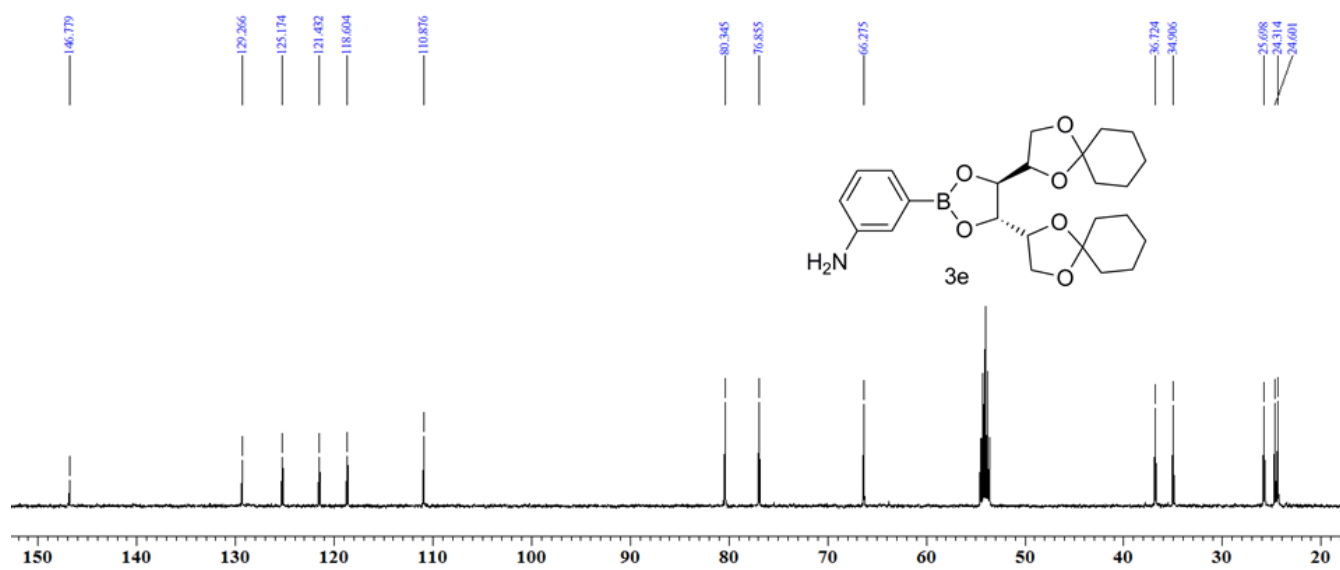

Figure S14:  $^{13}\text{C}$  NMR spectrum of compound **3e**.



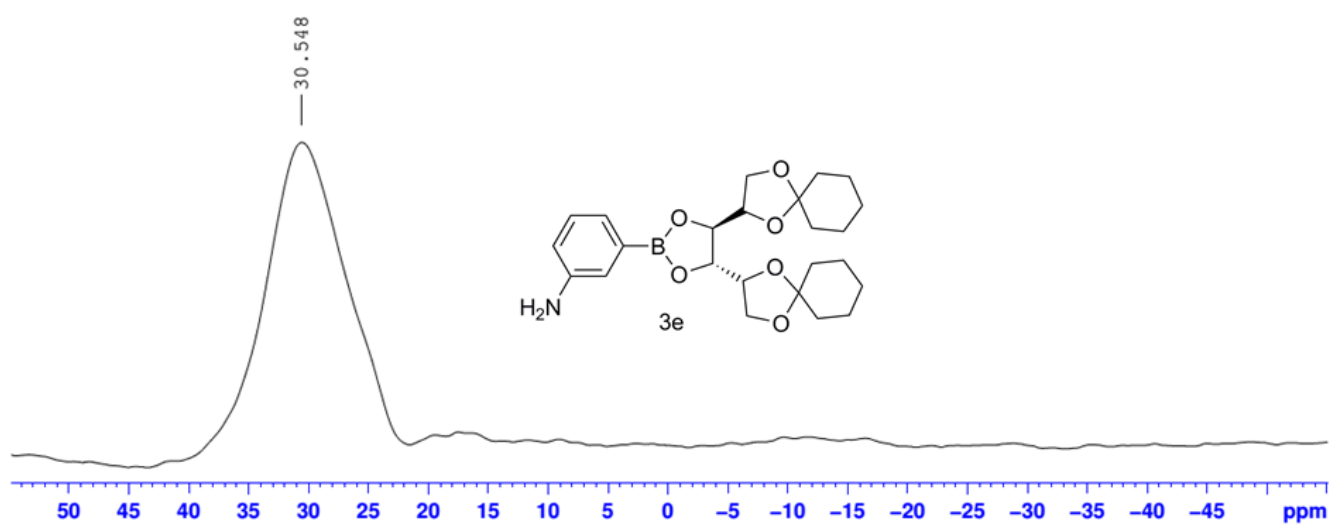

Figure S15:  $^{11}\text{B}$  NMR spectrum of compound **3e**.

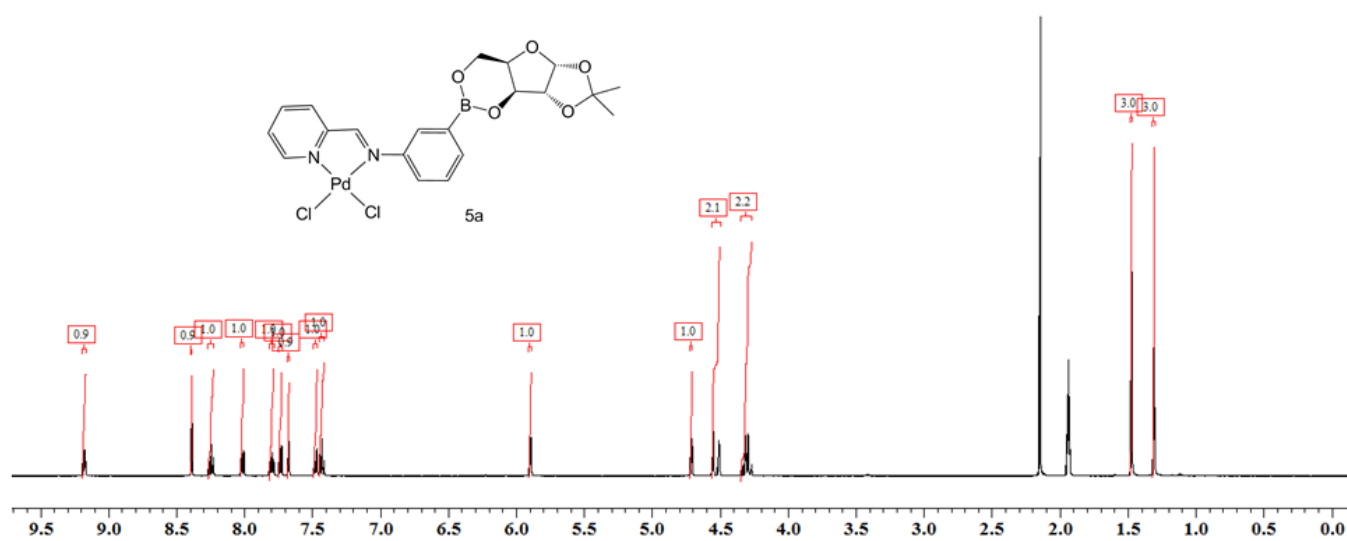

Figure S16:  $^1\text{H}$  NMR spectrum of compound **5a**.

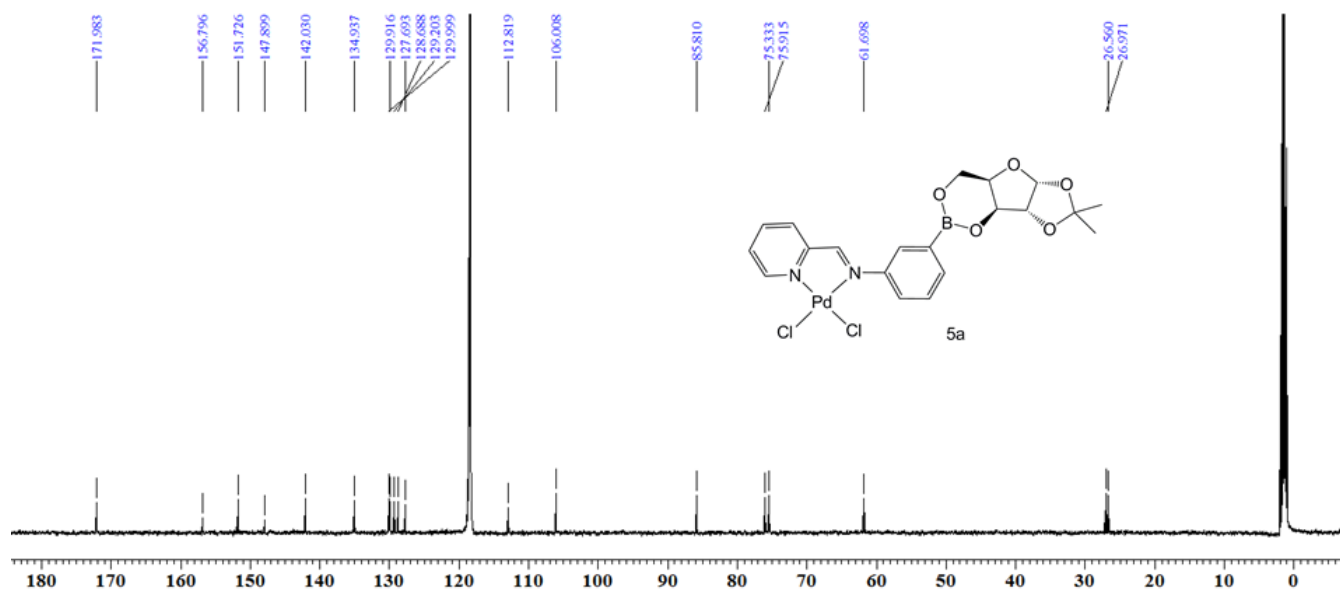

Figure S17:  $^{13}\text{C}$  NMR spectrum of compound **5a**.

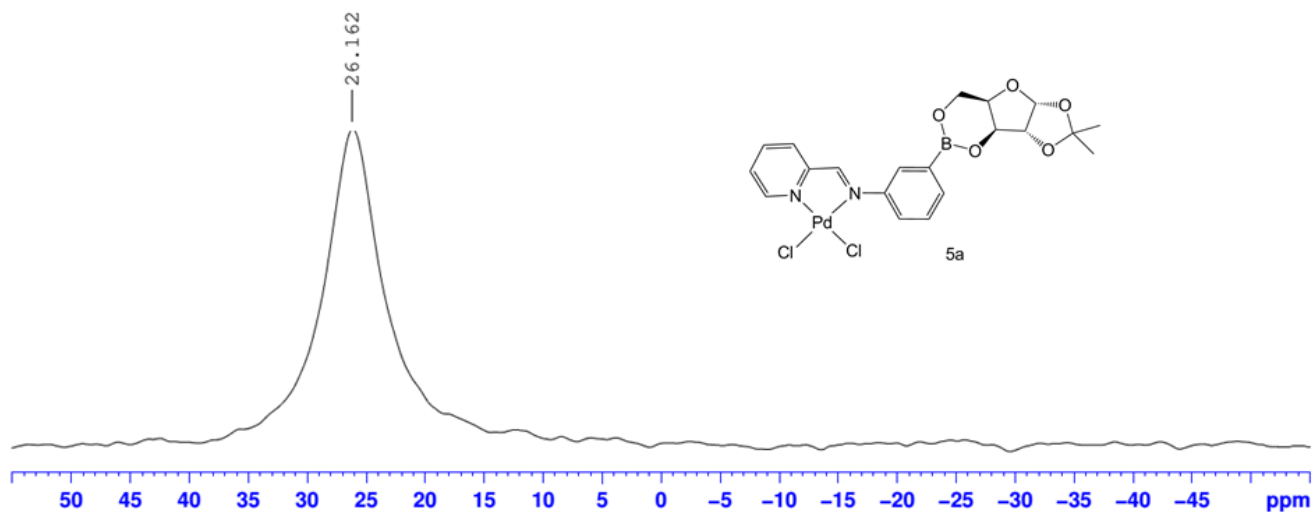

Figure S18:  $^{11}\text{B}$  NMR spectrum of compound **5a**.

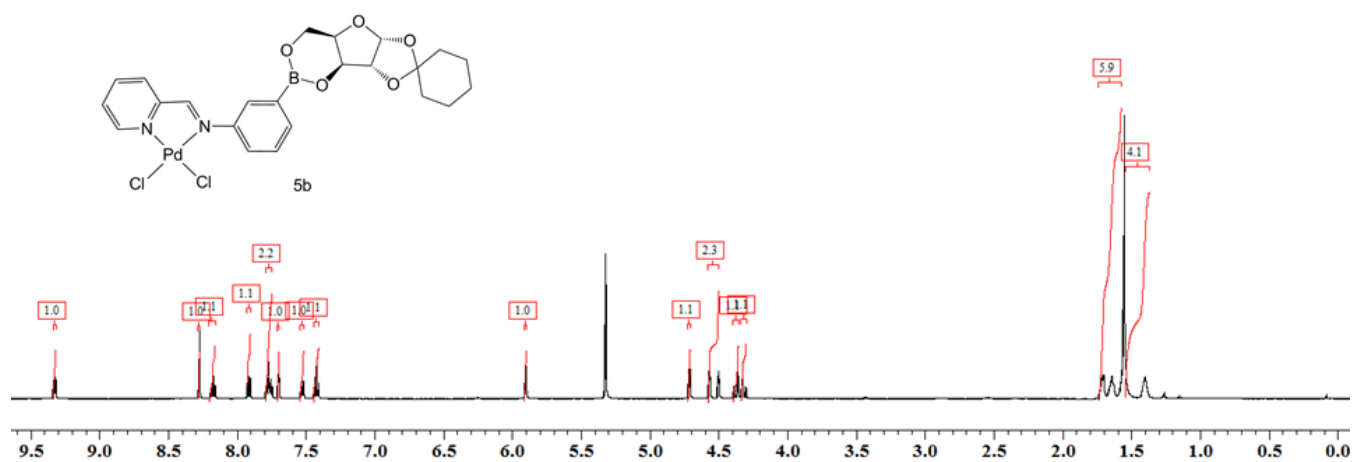

Figure S19:  $^1\text{H}$  NMR spectrum of compound **5b**.

(Note: Moisture peak was observed at  $\delta$ 1.57-1.59 ppm)

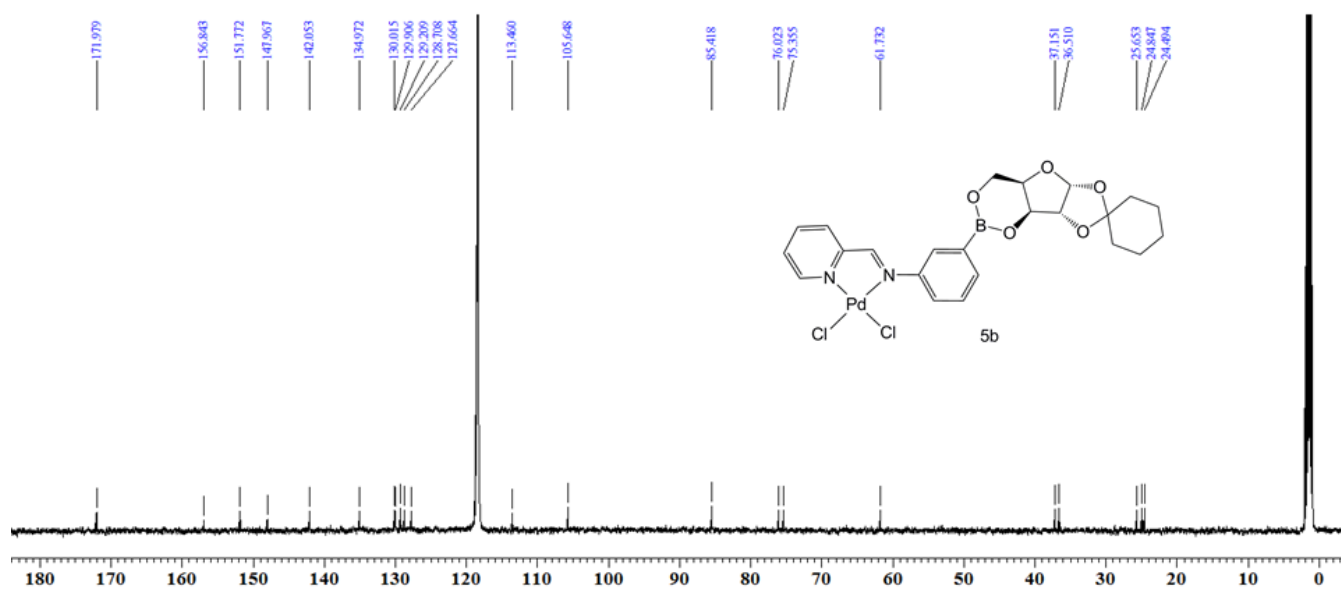

Figure S20:  $^{13}\text{C}$  NMR spectrum of compound **5b**.

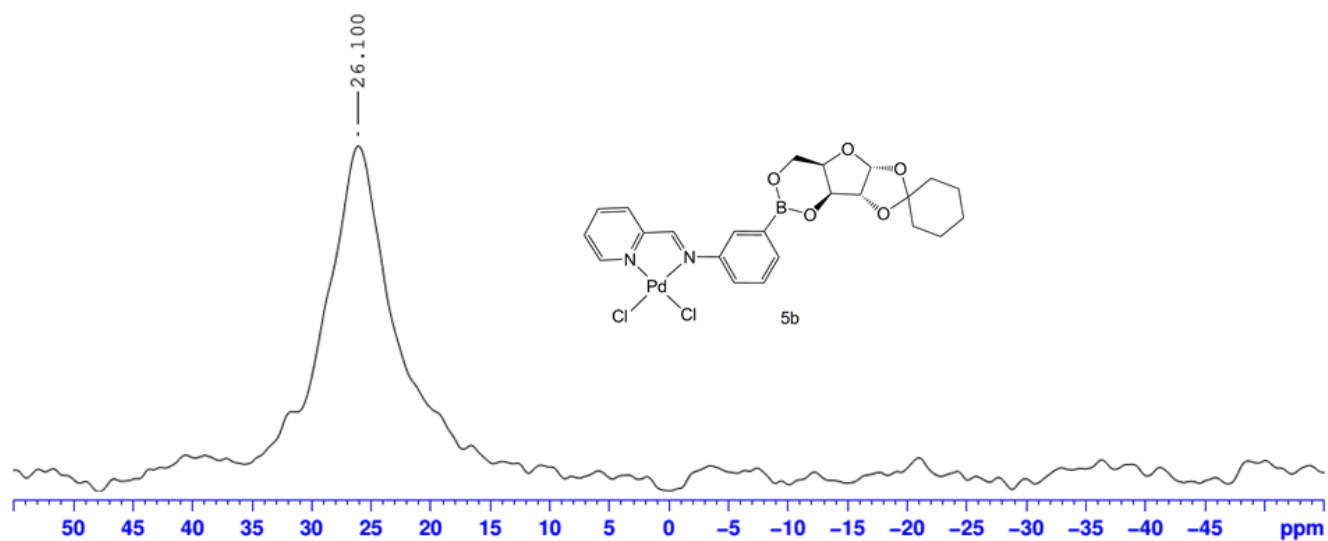

Figure S21:  $^{11}\text{B}$  NMR spectrum of compound **5b**.

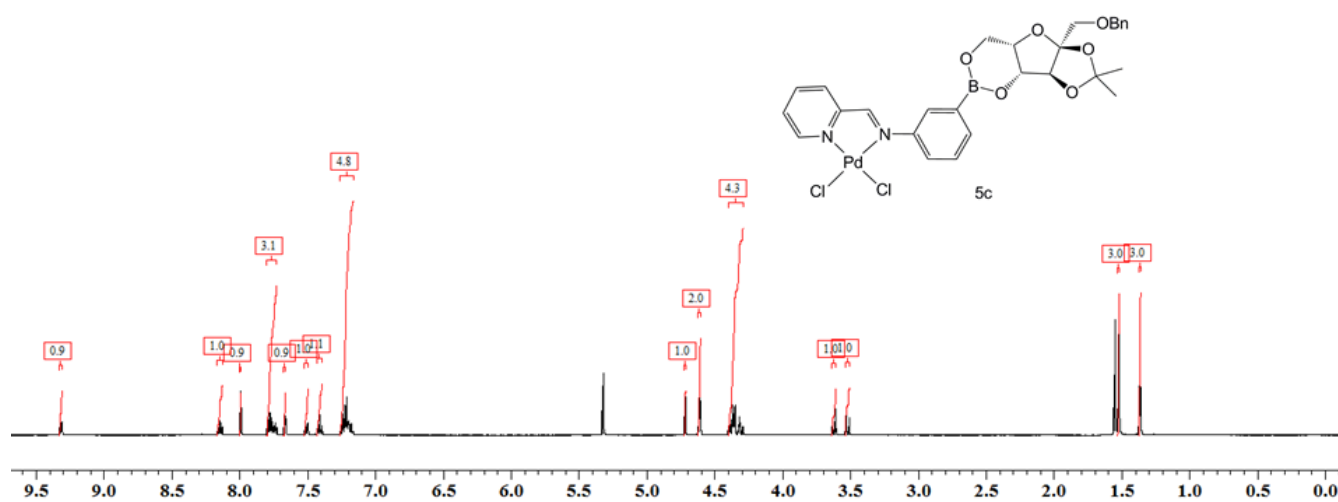

Figure S22:  $^1\text{H}$  NMR spectrum of compound **5c**.

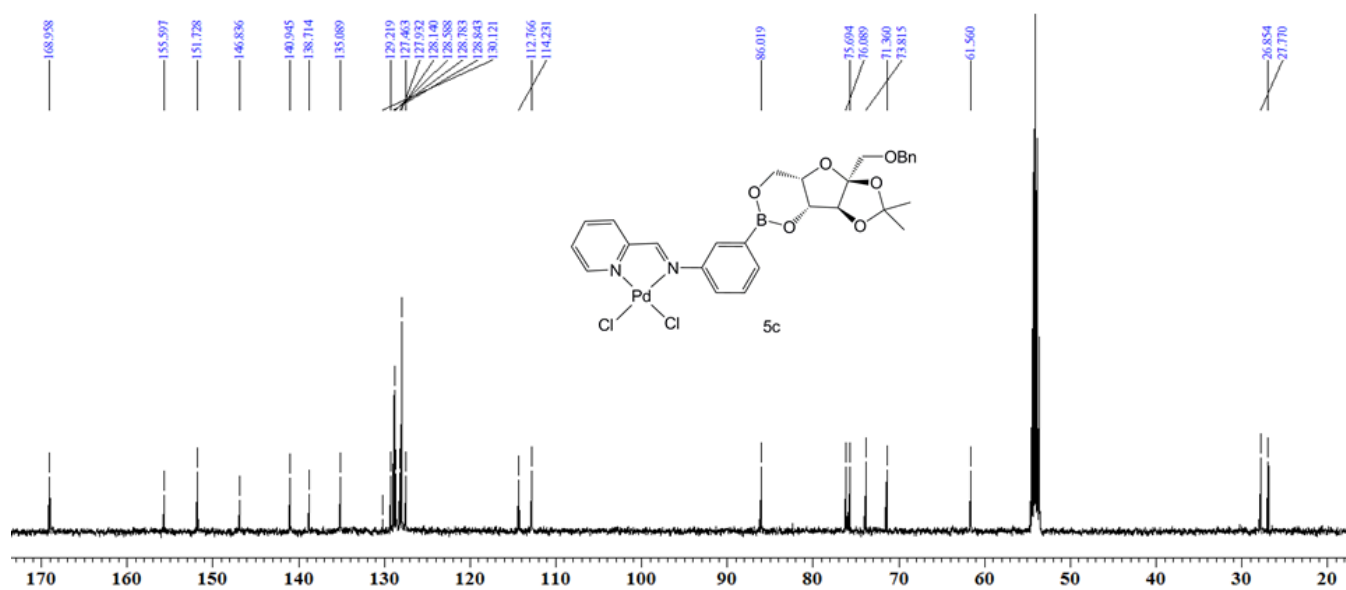

Figure S23: <sup>13</sup>C NMR spectrum of compound **5c**.

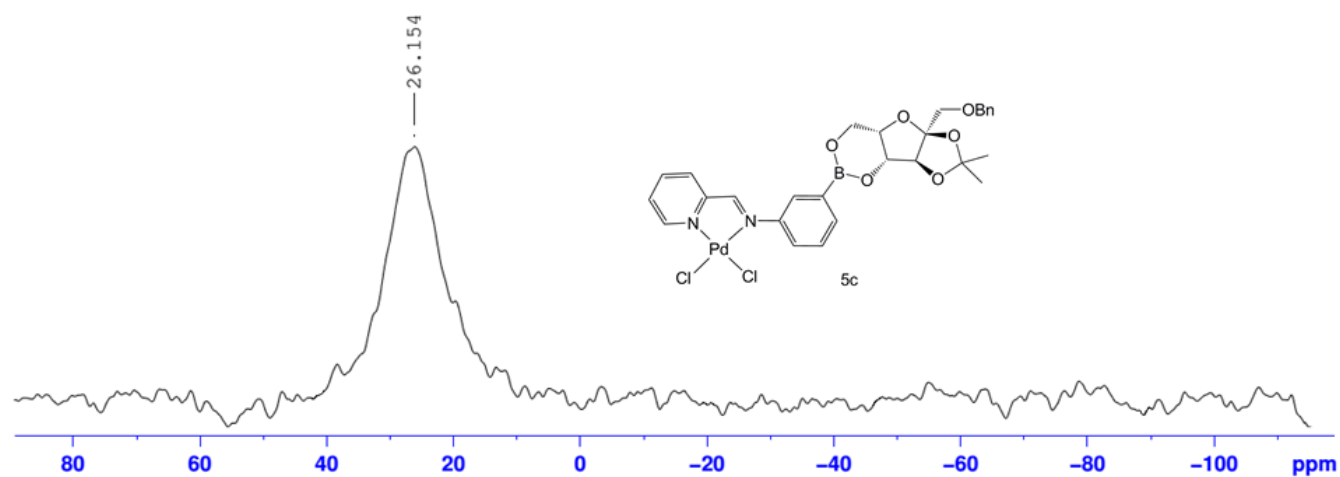

Figure S24: <sup>11</sup>B NMR spectrum of compound **5c**.

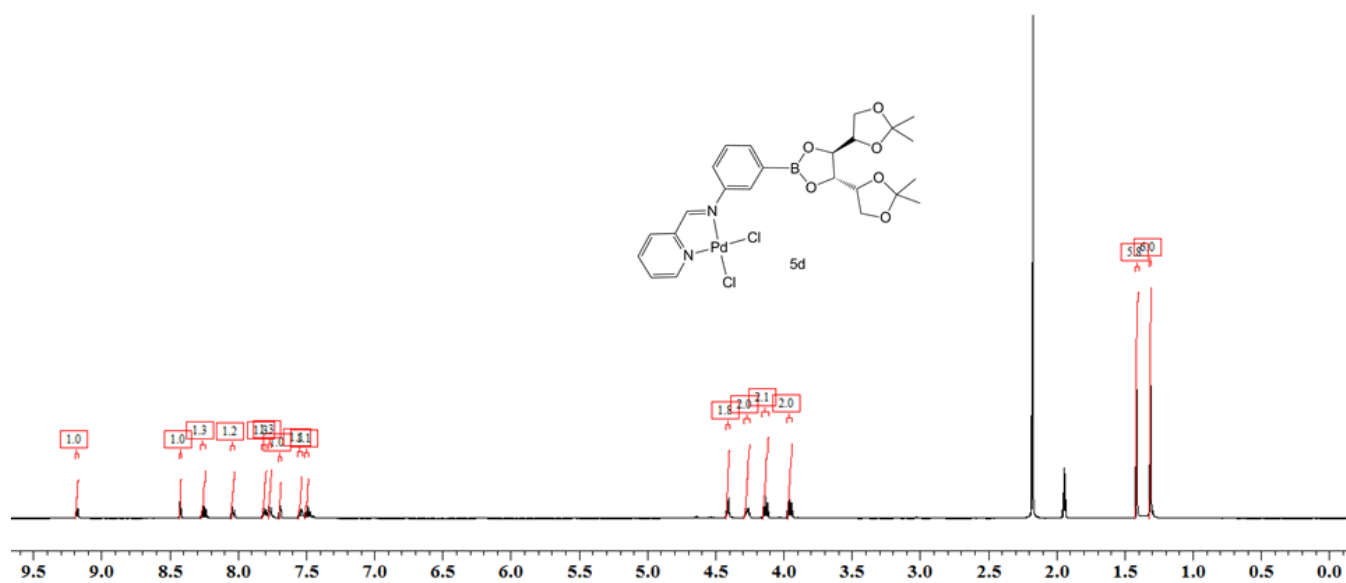

Figure S25:  $^1\text{H}$  NMR spectrum of compound **5d**.

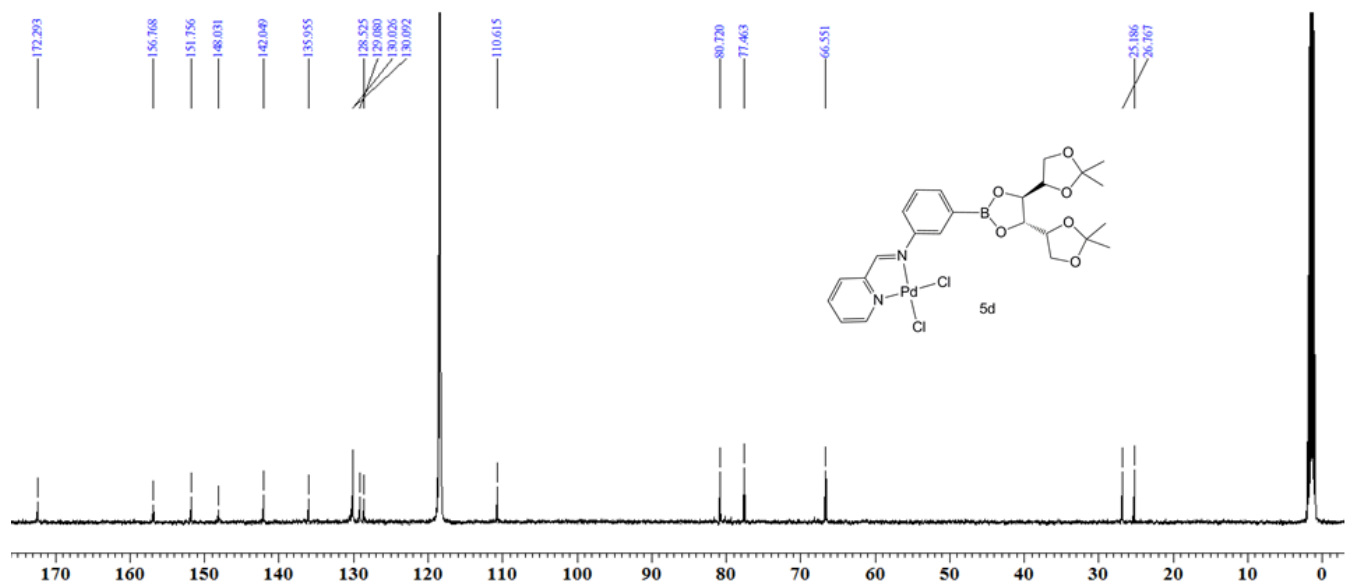

Figure S26:  $^{13}\text{C}$  NMR spectrum of compound **5d**.

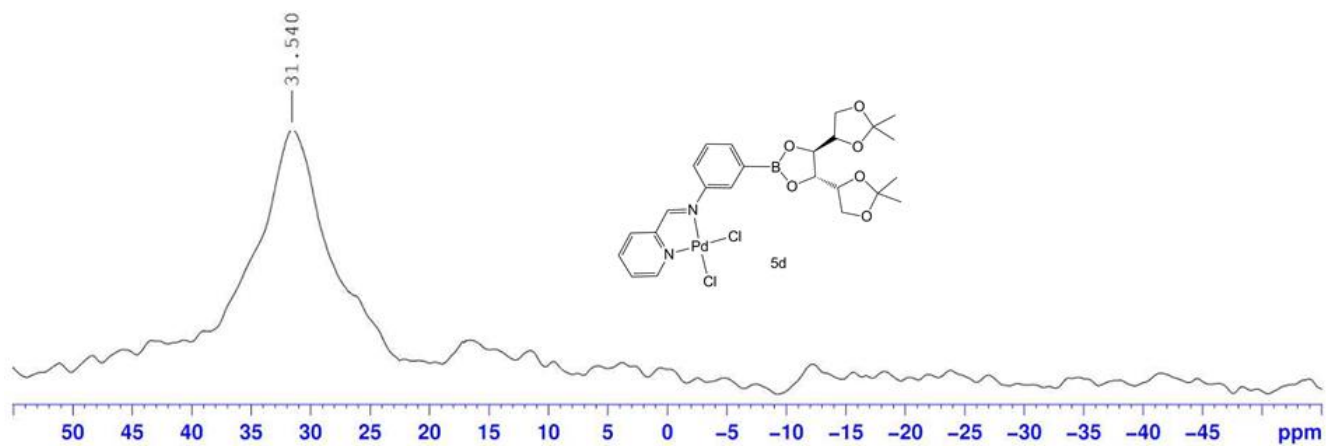

Figure S27:  $^{11}\text{B}$  NMR spectrum of compound **5d**.

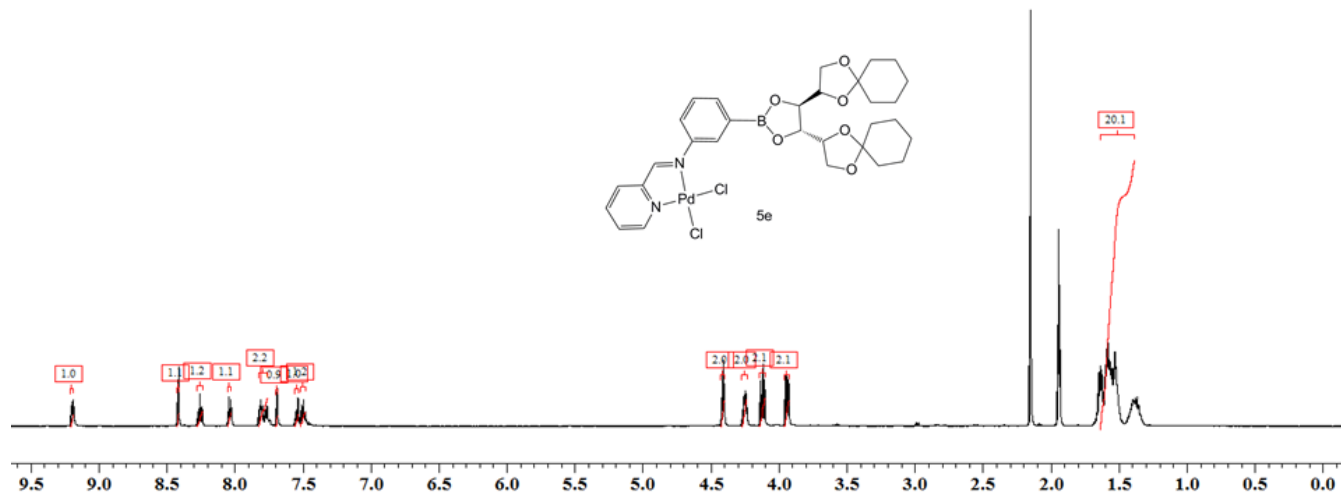

Figure S28:  $^1\text{H}$  NMR spectrum of compound **5e**.

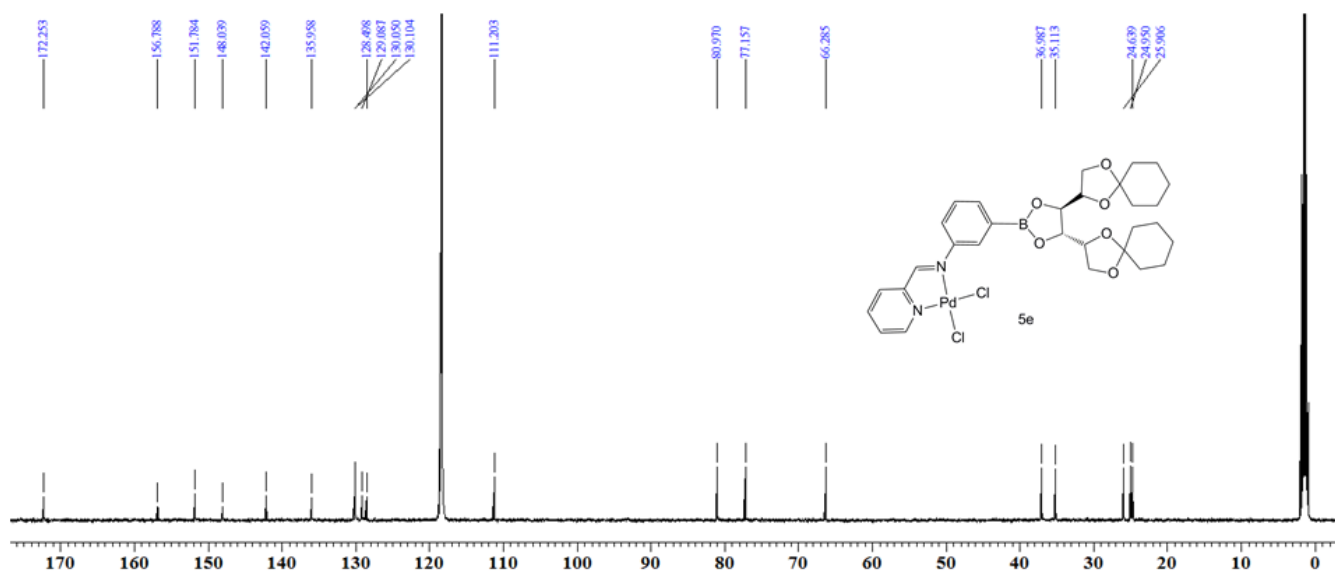

Figure S29:  $^{13}\text{C}$  NMR spectrum of compound **5e**.

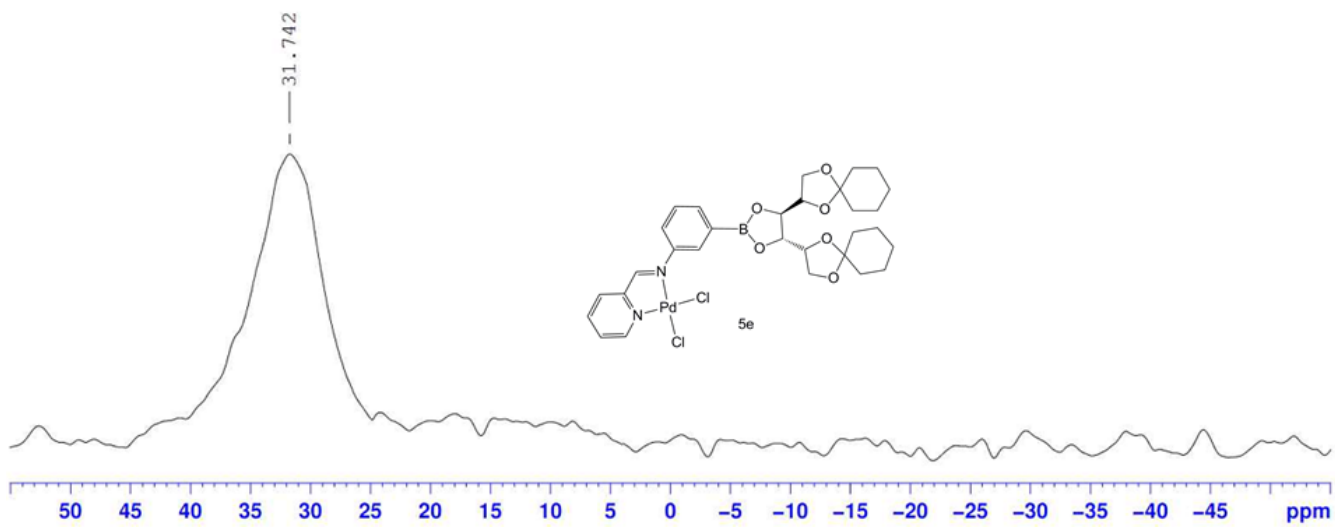

Figure S30:  $^{11}\text{B}$  NMR spectrum of compound **5e**.



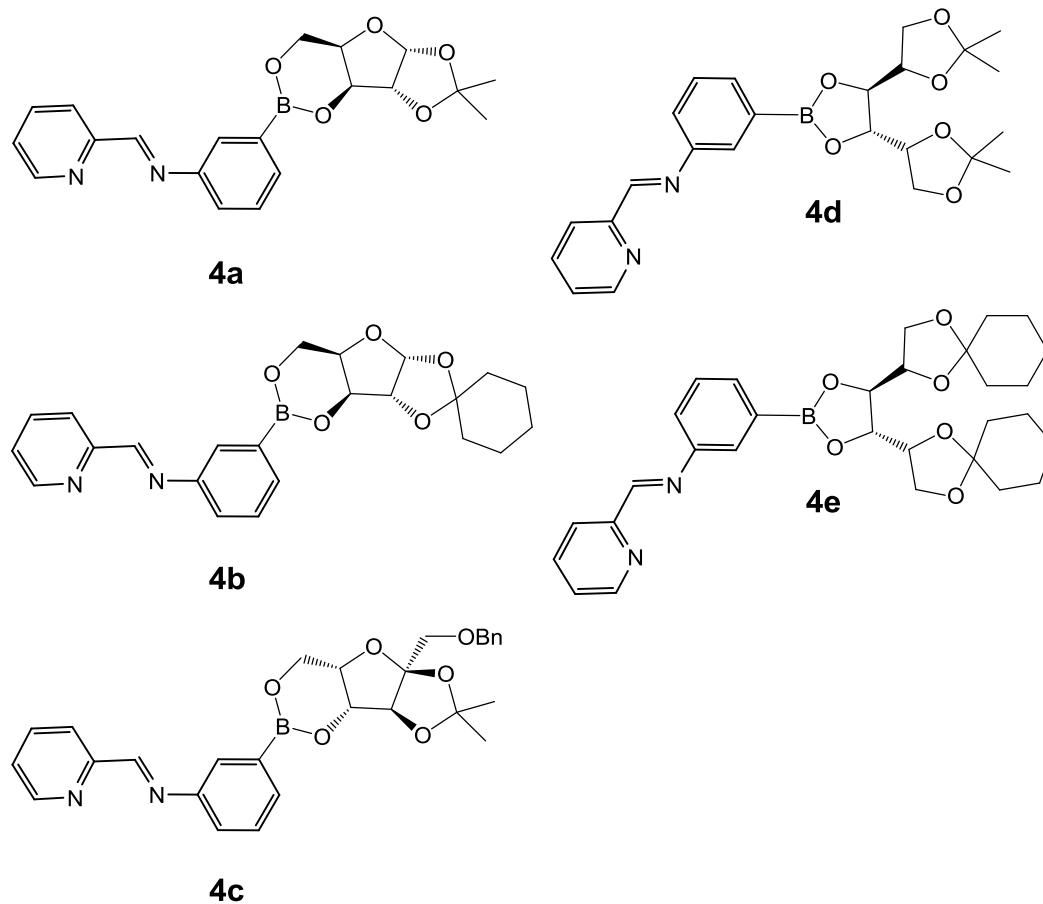

Chart S1. Structures of ligands (generated *in situ*) **4a-e**

### Stability studies of complex **5a**

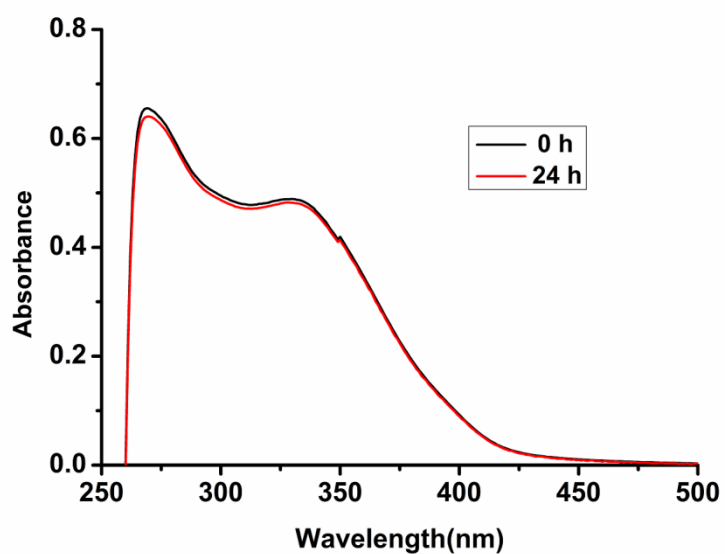

Figure S31. UV-visible spectra of **5a** in DMSO /10% DMEM medium (1:1) solution (pH = 7.4) at 25°C.

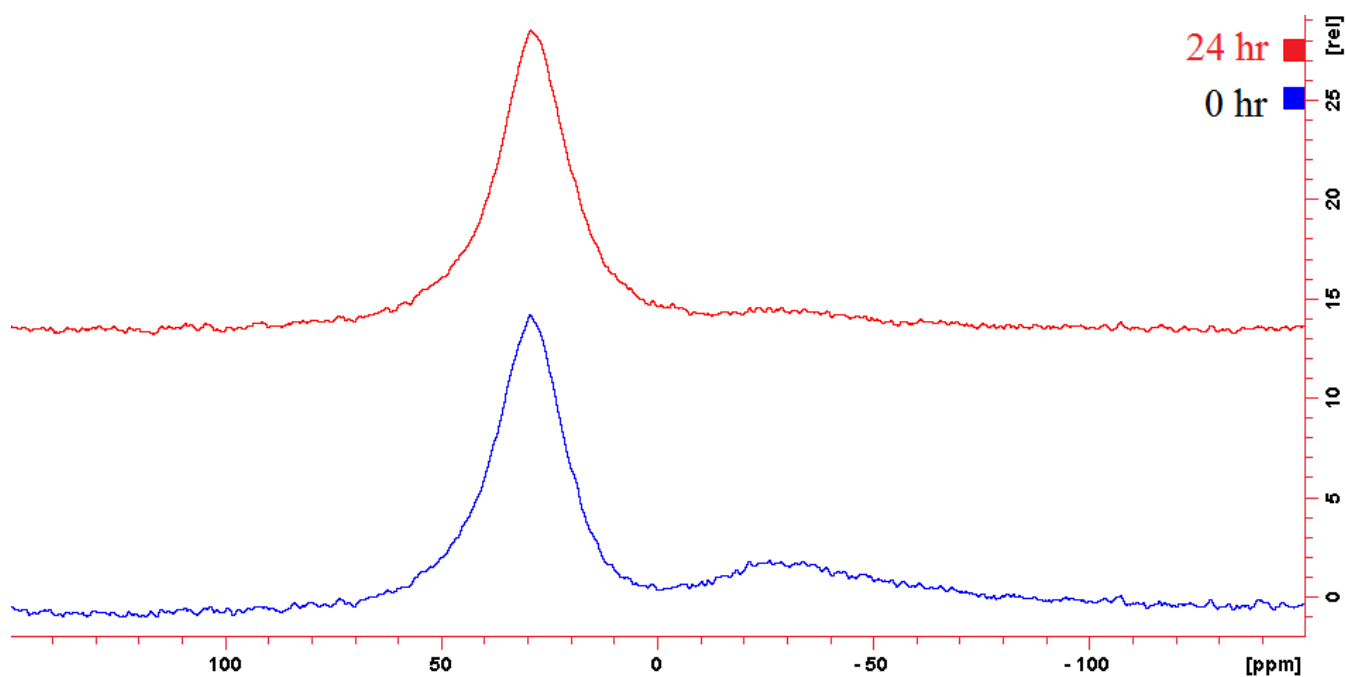

Figure S32.  $^{11}\text{B}$  NMR Spectra of **5a** in DMSO- $d_6$ /10% DMEM medium (2:1) solution (pH = 7.4) at 25°C

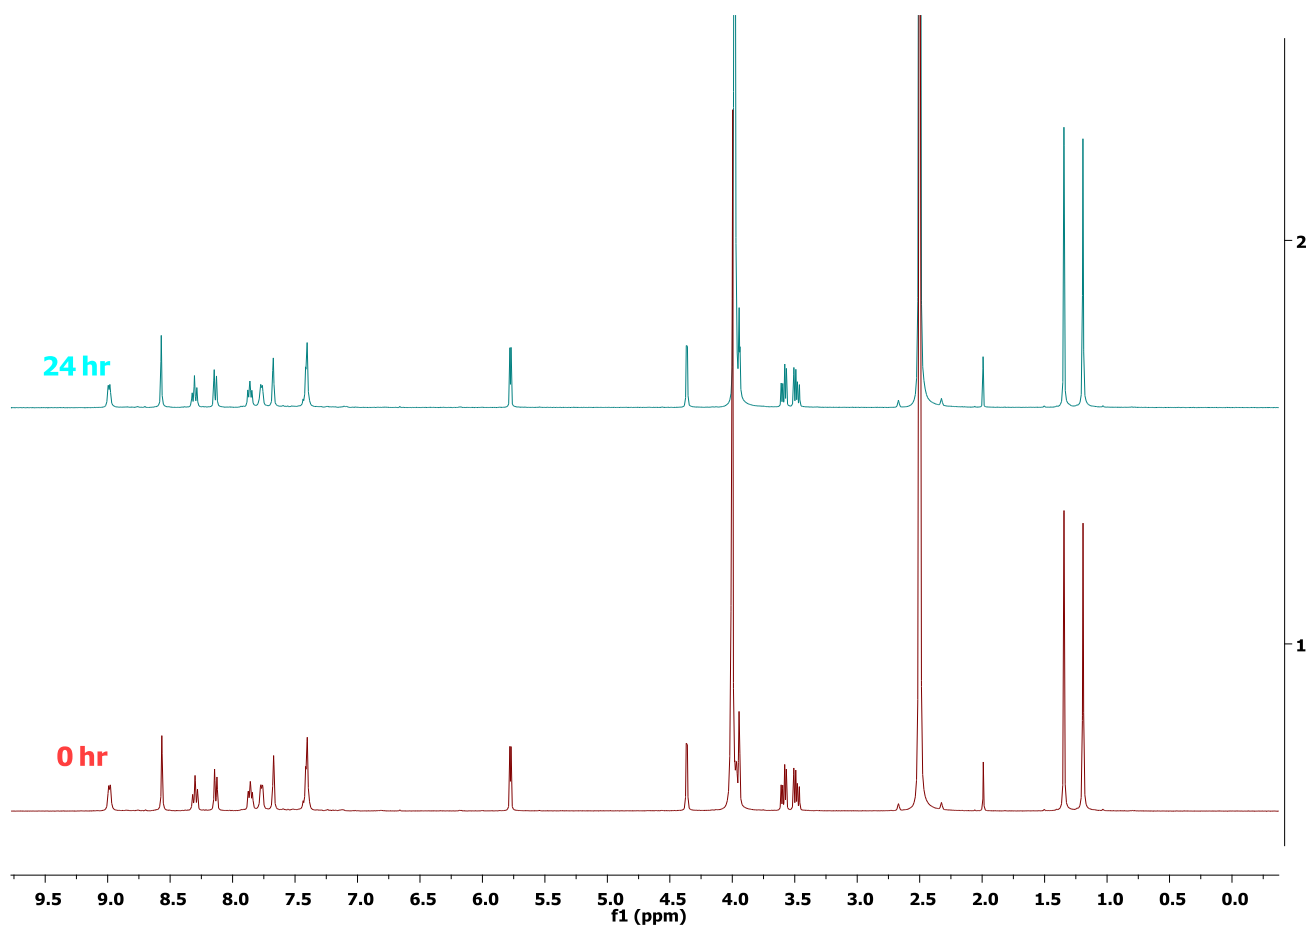

Figure S33.  $^1\text{H}$  NMR Spectra of **5a** in DMSO- $d_6$ /D $_2$ O (2:1) solution (pH = 7.0) at 25°C

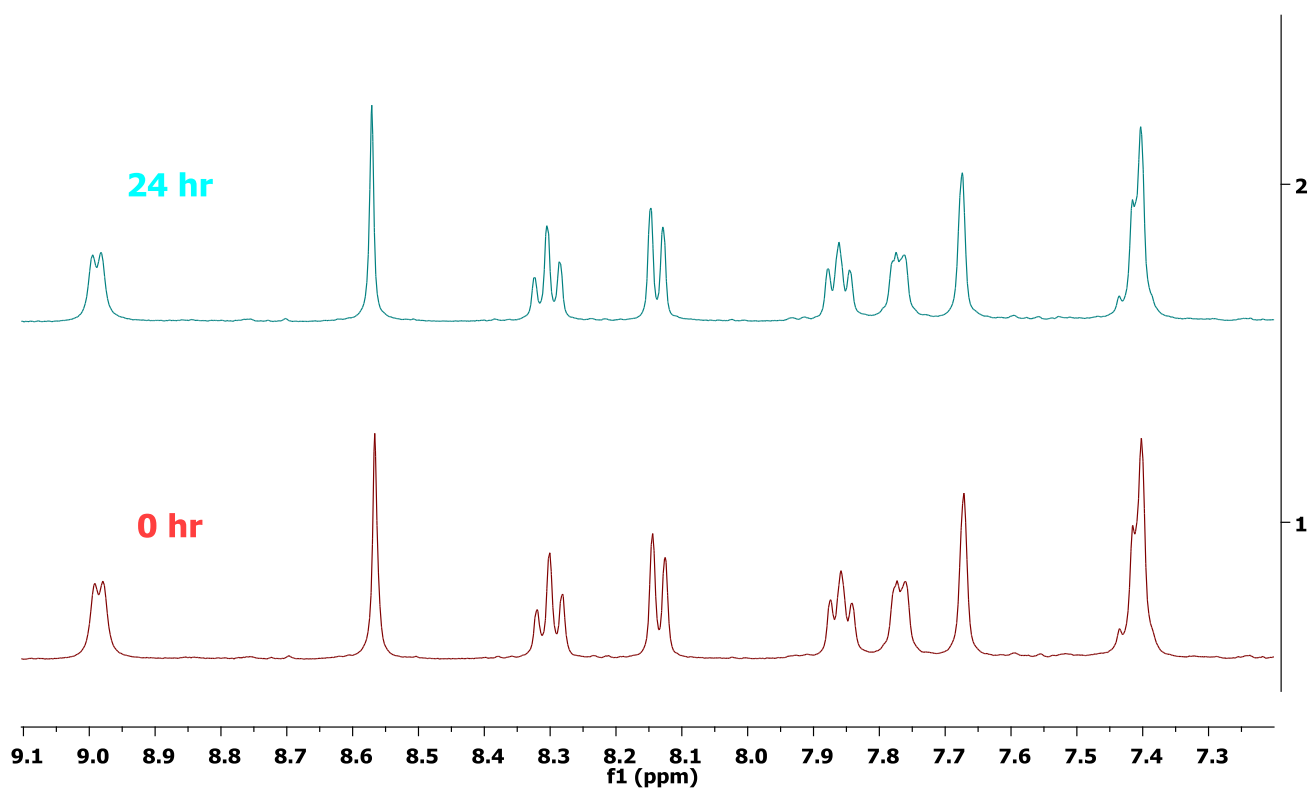

Figure S34. Aromatic region expansion of  $^1\text{H}$  NMR Spectra of **5a** in DMSO- $d_6$ /D $_2$ O (2:1) solution (pH = 7.0) at 25°C

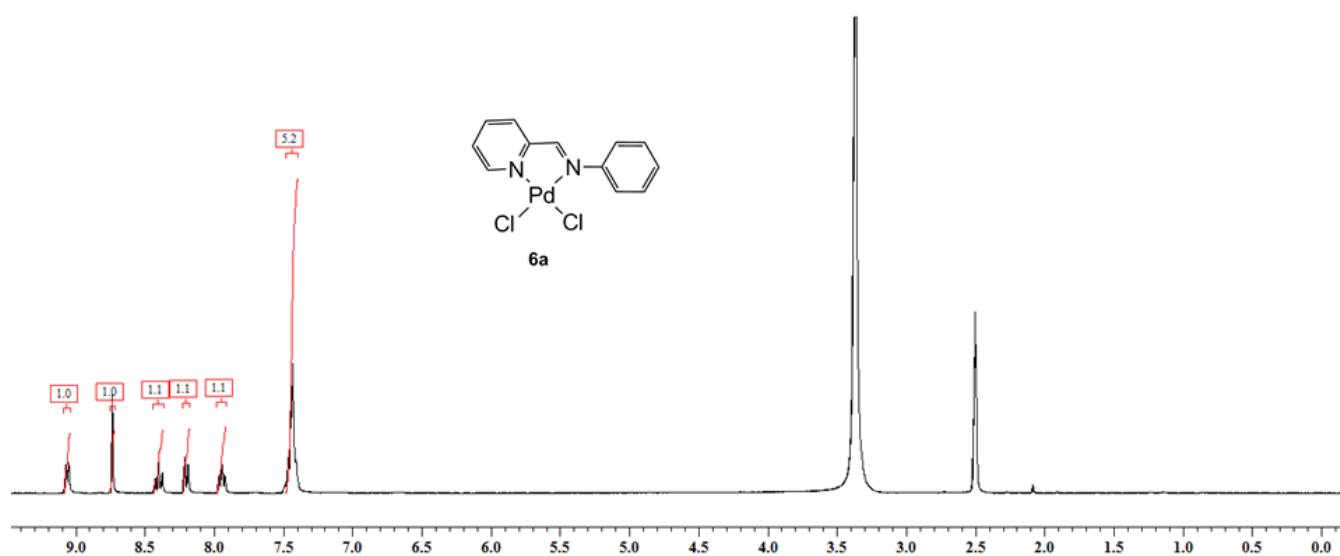

Figure S35:  $^1\text{H}$  NMR spectrum of compound **6a**.

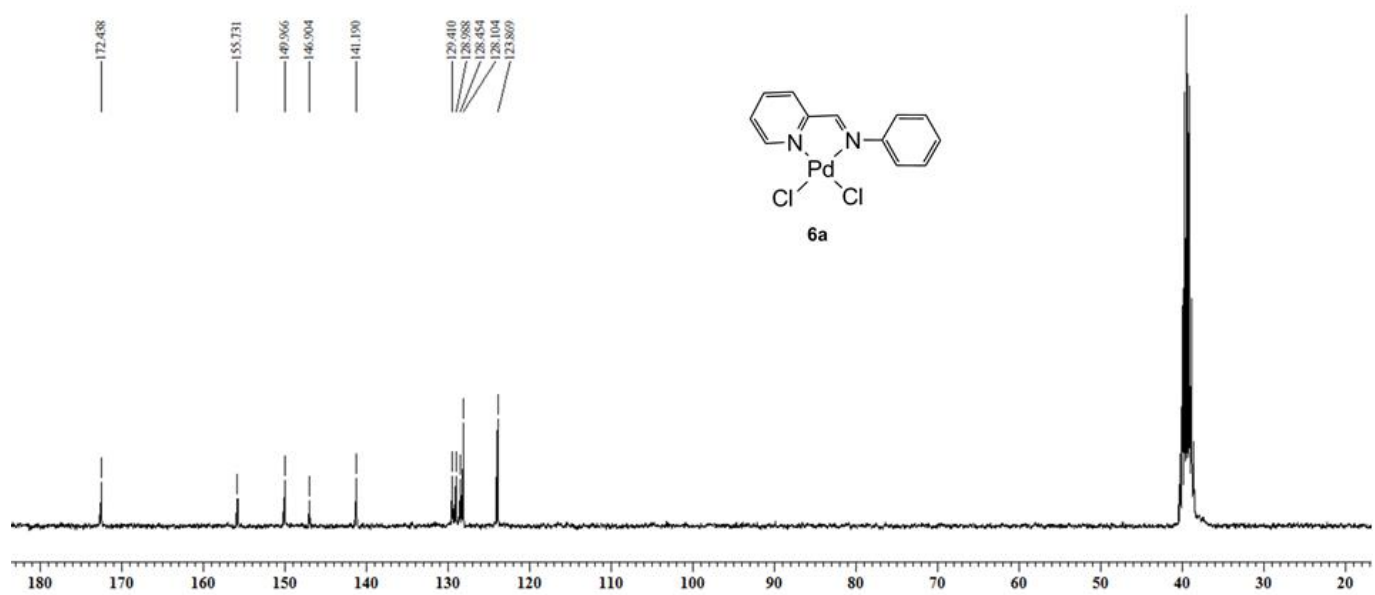

Figure S36: <sup>13</sup>C NMR spectrum of compound **6a**.

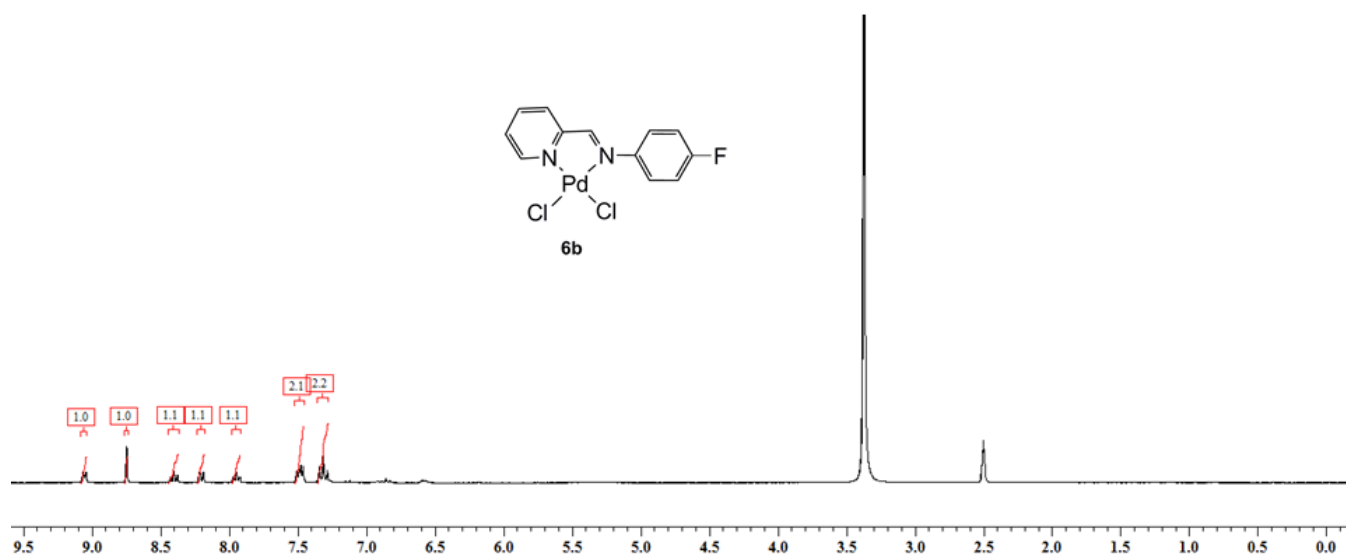

Figure S37: <sup>1</sup>H NMR spectrum of compound **6b**.

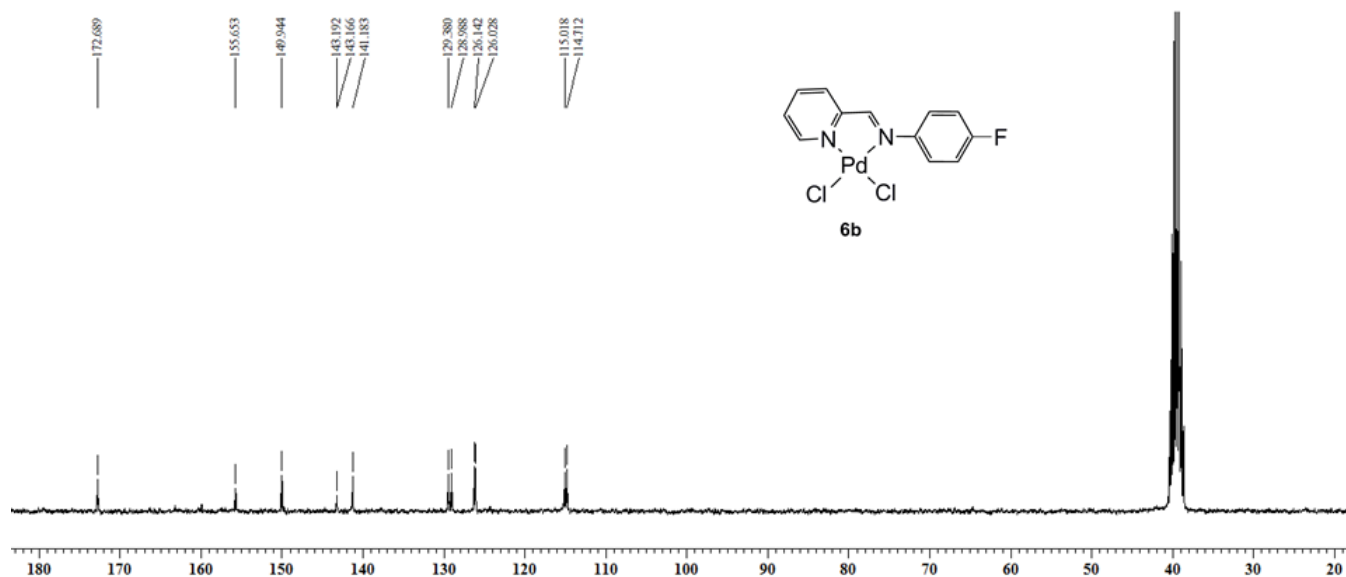

Figure S38:  $^{13}\text{C}$  NMR spectrum of compound **6b**.

Table S1. Bond lengths [ $\text{\AA}$ ] and angles [ $^\circ$ ] for **3a**.

|            |          |
|------------|----------|
| B(1)-O(5)  | 1.349(3) |
| B(1)-O(3)  | 1.365(2) |
| B(1)-C(9)  | 1.558(3) |
| C(1)-O(4)  | 1.397(2) |
| C(1)-O(1)  | 1.416(2) |
| C(1)-C(2)  | 1.531(3) |
| C(1)-H(1)  | 0.9800   |
| C(2)-O(2)  | 1.420(2) |
| C(2)-C(3)  | 1.514(3) |
| C(2)-H(2)  | 0.9800   |
| C(3)-O(3)  | 1.427(2) |
| C(3)-C(4)  | 1.500(3) |
| C(3)-H(3)  | 0.9800   |
| C(4)-O(4)  | 1.433(3) |
| C(4)-C(5)  | 1.506(3) |
| C(4)-H(4)  | 0.9800   |
| C(5)-O(5)  | 1.426(3) |
| C(5)-H(5A) | 0.9700   |
| C(5)-H(5B) | 0.9700   |

|                |            |
|----------------|------------|
| C(6)-O(1)      | 1.421(2)   |
| C(6)-O(2)      | 1.427(2)   |
| C(6)-C(7)      | 1.497(3)   |
| C(6)-C(8)      | 1.509(3)   |
| C(7)-H(7A)     | 0.9600     |
| C(7)-H(7B)     | 0.9600     |
| C(7)-H(7C)     | 0.9600     |
| C(8)-H(8A)     | 0.9600     |
| C(8)-H(8B)     | 0.9600     |
| C(8)-H(8C)     | 0.9600     |
| C(9)-C(10)     | 1.391(3)   |
| C(9)-C(14)     | 1.394(3)   |
| C(10)-C(11)    | 1.386(3)   |
| C(10)-H(10)    | 0.9300     |
| C(11)-C(12)    | 1.385(3)   |
| C(11)-N(1)     | 1.398(2)   |
| C(12)-C(13)    | 1.374(3)   |
| C(12)-H(12)    | 0.9300     |
| C(13)-C(14)    | 1.376(3)   |
| C(13)-H(13)    | 0.9300     |
| C(14)-H(14)    | 0.9300     |
| N(1)-H(1N)     | 0.90(2)    |
| N(1)-H(2N)     | 0.87(2)    |
|                |            |
| O(5)-B(1)-O(3) | 123.2(2)   |
| O(5)-B(1)-C(9) | 118.21(18) |
| O(3)-B(1)-C(9) | 118.53(18) |
| O(4)-C(1)-O(1) | 111.46(14) |
| O(4)-C(1)-C(2) | 107.39(14) |
| O(1)-C(1)-C(2) | 104.56(14) |
| O(4)-C(1)-H(1) | 111.1      |
| O(1)-C(1)-H(1) | 111.1      |
| C(2)-C(1)-H(1) | 111.1      |
| O(2)-C(2)-C(3) | 109.87(16) |
| O(2)-C(2)-C(1) | 104.18(14) |
| C(3)-C(2)-C(1) | 102.97(15) |
| O(2)-C(2)-H(2) | 113.0      |
| C(3)-C(2)-H(2) | 113.0      |
| C(1)-C(2)-H(2) | 113.0      |
| O(3)-C(3)-C(4) | 111.54(15) |

|                  |            |
|------------------|------------|
| O(3)-C(3)-C(2)   | 106.89(16) |
| C(4)-C(3)-C(2)   | 102.07(15) |
| O(3)-C(3)-H(3)   | 111.9      |
| C(4)-C(3)-H(3)   | 111.9      |
| C(2)-C(3)-H(3)   | 111.9      |
| O(4)-C(4)-C(3)   | 103.48(16) |
| O(4)-C(4)-C(5)   | 109.85(18) |
| C(3)-C(4)-C(5)   | 113.42(16) |
| O(4)-C(4)-H(4)   | 110.0      |
| C(3)-C(4)-H(4)   | 110.0      |
| C(5)-C(4)-H(4)   | 110.0      |
|                  |            |
| O(5)-C(5)-C(4)   | 112.12(17) |
| O(5)-C(5)-H(5A)  | 109.2      |
| C(4)-C(5)-H(5A)  | 109.2      |
| O(5)-C(5)-H(5B)  | 109.2      |
| C(4)-C(5)-H(5B)  | 109.2      |
| H(5A)-C(5)-H(5B) | 107.9      |
| O(1)-C(6)-O(2)   | 104.77(13) |
| O(1)-C(6)-C(7)   | 109.00(19) |
| O(2)-C(6)-C(7)   | 108.93(17) |
| O(1)-C(6)-C(8)   | 109.74(18) |
| O(2)-C(6)-C(8)   | 110.18(19) |
| C(7)-C(6)-C(8)   | 113.8(2)   |
| C(6)-C(7)-H(7A)  | 109.5      |
| C(6)-C(7)-H(7B)  | 109.5      |
| H(7A)-C(7)-H(7B) | 109.5      |
| C(6)-C(7)-H(7C)  | 109.5      |
| H(7A)-C(7)-H(7C) | 109.5      |
| H(7B)-C(7)-H(7C) | 109.5      |
| C(6)-C(8)-H(8A)  | 109.5      |
| C(6)-C(8)-H(8B)  | 109.5      |
| H(8A)-C(8)-H(8B) | 109.5      |
| C(6)-C(8)-H(8C)  | 109.5      |
| H(8A)-C(8)-H(8C) | 109.5      |
| H(8B)-C(8)-H(8C) | 109.5      |
| C(10)-C(9)-C(14) | 117.63(18) |
| C(10)-C(9)-B(1)  | 121.40(17) |
| C(14)-C(9)-B(1)  | 120.97(17) |
| C(11)-C(10)-C(9) | 122.14(18) |

|                   |            |
|-------------------|------------|
| C(11)-C(10)-H(10) | 118.9      |
| C(9)-C(10)-H(10)  | 118.9      |
| C(12)-C(11)-C(10) | 118.49(17) |
| C(12)-C(11)-N(1)  | 120.36(18) |
| C(10)-C(11)-N(1)  | 121.02(18) |
| C(13)-C(12)-C(11) | 120.45(19) |
| C(13)-C(12)-H(12) | 119.8      |
| C(11)-C(12)-H(12) | 119.8      |
| C(12)-C(13)-C(14) | 120.54(19) |
| C(12)-C(13)-H(13) | 119.7      |
| C(14)-C(13)-H(13) | 119.7      |
| C(13)-C(14)-C(9)  | 120.73(17) |
| C(13)-C(14)-H(14) | 119.6      |
| C(9)-C(14)-H(14)  | 119.6      |
| C(11)-N(1)-H(1N)  | 111.2(15)  |
| C(11)-N(1)-H(2N)  | 112.7(14)  |
| H(1N)-N(1)-H(2N)  | 119(2)     |
| C(1)-O(1)-C(6)    | 109.44(13) |
| C(2)-O(2)-C(6)    | 106.74(14) |
| B(1)-O(3)-C(3)    | 121.49(16) |
| C(1)-O(4)-C(4)    | 108.44(14) |
| B(1)-O(5)-C(5)    | 120.26(16) |

---

Table S2. Bond lengths [ $\text{\AA}$ ] and angles [ $^\circ$ ] for **5a**.

|           |          |
|-----------|----------|
| B(1)-O(5) | 1.362(3) |
| B(1)-O(3) | 1.378(3) |
| B(1)-C(9) | 1.578(3) |
| C(1)-O(1) | 1.400(3) |
| C(1)-O(4) | 1.415(3) |
| C(1)-C(2) | 1.532(3) |
| C(1)-H(1) | 0.9800   |
| C(2)-O(2) | 1.427(3) |
| C(2)-C(3) | 1.522(3) |
| C(2)-H(2) | 0.9800   |
| C(3)-O(3) | 1.438(3) |
| C(3)-C(4) | 1.525(3) |



|             |          |
|-------------|----------|
| C(3)-H(3)   | 0.9800   |
| C(4)-O(4)   | 1.440(3) |
| C(4)-C(5)   | 1.509(3) |
| C(4)-H(4)   | 0.9800   |
| C(5)-O(5)   | 1.441(3) |
| C(5)-H(5A)  | 0.9700   |
| C(5)-H(5B)  | 0.9700   |
| C(6)-O(1)   | 1.430(4) |
| C(6)-O(2)   | 1.430(4) |
| C(6)-C(8)   | 1.514(4) |
| C(6)-C(7)   | 1.526(4) |
| C(7)-H(7A)  | 0.9600   |
| C(7)-H(7B)  | 0.9600   |
| C(7)-H(7C)  | 0.9600   |
| C(8)-H(8A)  | 0.9600   |
| C(8)-H(8B)  | 0.9600   |
| C(8)-H(8C)  | 0.9600   |
| C(9)-C(14)  | 1.396(3) |
| C(9)-C(10)  | 1.412(3) |
| C(10)-C(11) | 1.394(3) |
| C(10)-H(10) | 0.9300   |
| C(11)-C(12) | 1.382(3) |
| C(11)-N(1)  | 1.449(2) |
| C(12)-C(13) | 1.403(4) |
| C(12)-H(12) | 0.9300   |
| C(13)-C(14) | 1.383(4) |
| C(13)-H(13) | 0.9300   |
| C(14)-H(14) | 0.9300   |
| C(15)-N(1)  | 1.287(3) |
| C(15)-C(16) | 1.464(3) |
| C(15)-H(15) | 0.9300   |
| C(16)-N(2)  | 1.362(3) |
| C(16)-C(17) | 1.386(3) |
| C(17)-C(18) | 1.392(4) |
| C(17)-H(17) | 0.9300   |
| C(18)-C(19) | 1.371(4) |
| C(18)-H(18) | 0.9300   |
| C(19)-C(20) | 1.391(4) |
| C(19)-H(19) | 0.9300   |
| C(20)-N(2)  | 1.352(3) |

|                  |            |
|------------------|------------|
| C(20)-H(20)      | 0.9300     |
| Cl(1)-Pd(1)      | 2.2953(6)  |
| Cl(2)-Pd(1)      | 2.2921(6)  |
| N(1)-Pd(1)       | 2.0441(16) |
| N(2)-Pd(1)       | 2.0362(17) |
| O(5)-B(1)-O(3)   | 123.7(2)   |
| O(5)-B(1)-C(9)   | 116.18(19) |
| O(3)-B(1)-C(9)   | 120.10(18) |
| O(1)-C(1)-O(4)   | 112.5(2)   |
| O(1)-C(1)-C(2)   | 105.3(2)   |
| O(4)-C(1)-C(2)   | 106.84(18) |
| O(1)-C(1)-H(1)   | 110.7      |
| O(4)-C(1)-H(1)   | 110.7      |
| C(2)-C(1)-H(1)   | 110.7      |
| O(2)-C(2)-C(3)   | 108.9(2)   |
| O(2)-C(2)-C(1)   | 103.73(19) |
| C(3)-C(2)-C(1)   | 103.59(18) |
| O(2)-C(2)-H(2)   | 113.2      |
| C(3)-C(2)-H(2)   | 113.2      |
| C(1)-C(2)-H(2)   | 113.2      |
| O(3)-C(3)-C(2)   | 107.60(17) |
| O(3)-C(3)-C(4)   | 111.80(18) |
| C(2)-C(3)-C(4)   | 101.57(17) |
| O(3)-C(3)-H(3)   | 111.8      |
| C(2)-C(3)-H(3)   | 111.8      |
| C(4)-C(3)-H(3)   | 111.8      |
| O(4)-C(4)-C(5)   | 109.9(2)   |
| O(4)-C(4)-C(3)   | 103.11(16) |
| C(5)-C(4)-C(3)   | 114.21(18) |
| O(4)-C(4)-H(4)   | 109.8      |
| C(5)-C(4)-H(4)   | 109.8      |
| C(3)-C(4)-H(4)   | 109.8      |
| O(5)-C(5)-C(4)   | 112.61(17) |
| O(5)-C(5)-H(5A)  | 109.1      |
| C(4)-C(5)-H(5A)  | 109.1      |
| O(5)-C(5)-H(5B)  | 109.1      |
| C(4)-C(5)-H(5B)  | 109.1      |
| H(5A)-C(5)-H(5B) | 107.8      |
| O(1)-C(6)-O(2)   | 105.9(2)   |

|                   |            |
|-------------------|------------|
| O(1)-C(6)-C(8)    | 110.3(3)   |
| O(2)-C(6)-C(8)    | 108.7(3)   |
| O(1)-C(6)-C(7)    | 108.4(3)   |
| O(2)-C(6)-C(7)    | 111.2(3)   |
| C(8)-C(6)-C(7)    | 112.1(3)   |
| C(6)-C(7)-H(7A)   | 109.5      |
| C(6)-C(7)-H(7B)   | 109.5      |
| H(7A)-C(7)-H(7B)  | 109.5      |
| C(6)-C(7)-H(7C)   | 109.5      |
| H(7A)-C(7)-H(7C)  | 109.5      |
| H(7B)-C(7)-H(7C)  | 109.5      |
| C(6)-C(8)-H(8A)   | 109.5      |
| C(6)-C(8)-H(8B)   | 109.5      |
| H(8A)-C(8)-H(8B)  | 109.5      |
| C(6)-C(8)-H(8C)   | 109.5      |
| H(8A)-C(8)-H(8C)  | 109.5      |
| H(8B)-C(8)-H(8C)  | 109.5      |
| C(14)-C(9)-C(10)  | 117.7(2)   |
| C(14)-C(9)-B(1)   | 119.96(19) |
| C(10)-C(9)-B(1)   | 122.38(19) |
| C(11)-C(10)-C(9)  | 120.1(2)   |
| C(11)-C(10)-H(10) | 120.0      |
| C(9)-C(10)-H(10)  | 120.0      |
| C(12)-C(11)-C(10) | 121.40(19) |
| C(12)-C(11)-N(1)  | 117.41(19) |
| C(10)-C(11)-N(1)  | 121.2(2)   |
| C(11)-C(12)-C(13) | 118.9(2)   |
| C(11)-C(12)-H(12) | 120.5      |
| C(13)-C(12)-H(12) | 120.5      |
| C(14)-C(13)-C(12) | 119.8(2)   |
| C(14)-C(13)-H(13) | 120.1      |
| C(12)-C(13)-H(13) | 120.1      |
| C(13)-C(14)-C(9)  | 122.1(2)   |
| C(13)-C(14)-H(14) | 119.0      |
| C(9)-C(14)-H(14)  | 119.0      |
| N(1)-C(15)-C(16)  | 118.18(18) |
| N(1)-C(15)-H(15)  | 120.9      |
| C(16)-C(15)-H(15) | 120.9      |
| N(2)-C(16)-C(17)  | 122.3(2)   |
| N(2)-C(16)-C(15)  | 114.06(18) |

|                   |            |
|-------------------|------------|
| C(17)-C(16)-C(15) | 123.4(2)   |
| C(16)-C(17)-C(18) | 118.6(2)   |
| C(16)-C(17)-H(17) | 120.7      |
| C(18)-C(17)-H(17) | 120.7      |
| C(19)-C(18)-C(17) | 119.2(2)   |
| C(19)-C(18)-H(18) | 120.4      |
| C(17)-C(18)-H(18) | 120.4      |
| C(18)-C(19)-C(20) | 119.9(2)   |
| C(18)-C(19)-H(19) | 120.0      |
| C(20)-C(19)-H(19) | 120.0      |
| N(2)-C(20)-C(19)  | 121.5(2)   |
| N(2)-C(20)-H(20)  | 119.3      |
| C(19)-C(20)-H(20) | 119.3      |
| C(15)-N(1)-C(11)  | 118.49(16) |
| C(15)-N(1)-Pd(1)  | 113.68(13) |
| C(11)-N(1)-Pd(1)  | 127.71(13) |
| C(20)-N(2)-C(16)  | 118.35(19) |
| C(20)-N(2)-Pd(1)  | 128.37(16) |
| C(16)-N(2)-Pd(1)  | 113.24(13) |
| C(1)-O(1)-C(6)    | 111.2(2)   |
| C(2)-O(2)-C(6)    | 109.8(2)   |
| B(1)-O(3)-C(3)    | 120.78(17) |
| C(1)-O(4)-C(4)    | 109.34(17) |
| B(1)-O(5)-C(5)    | 120.72(18) |
| N(2)-Pd(1)-N(1)   | 80.25(7)   |
| N(2)-Pd(1)-Cl(2)  | 173.00(6)  |
| N(1)-Pd(1)-Cl(2)  | 95.10(5)   |
| N(2)-Pd(1)-Cl(1)  | 93.83(5)   |
| N(1)-Pd(1)-Cl(1)  | 173.61(5)  |
| Cl(2)-Pd(1)-Cl(1) | 91.01(3)   |

---
